# Supplementary material for: Probing the potential of CnaB-type domains for the design of tag/catcher systems
Source: PubMed Central journal article supplement (PMC5487036; doi:10.1371/journal.pone.0179740), 2017-06-27
Supplement: pone.0179740.s001.pdf [file pone.0179740.s001.pdf]

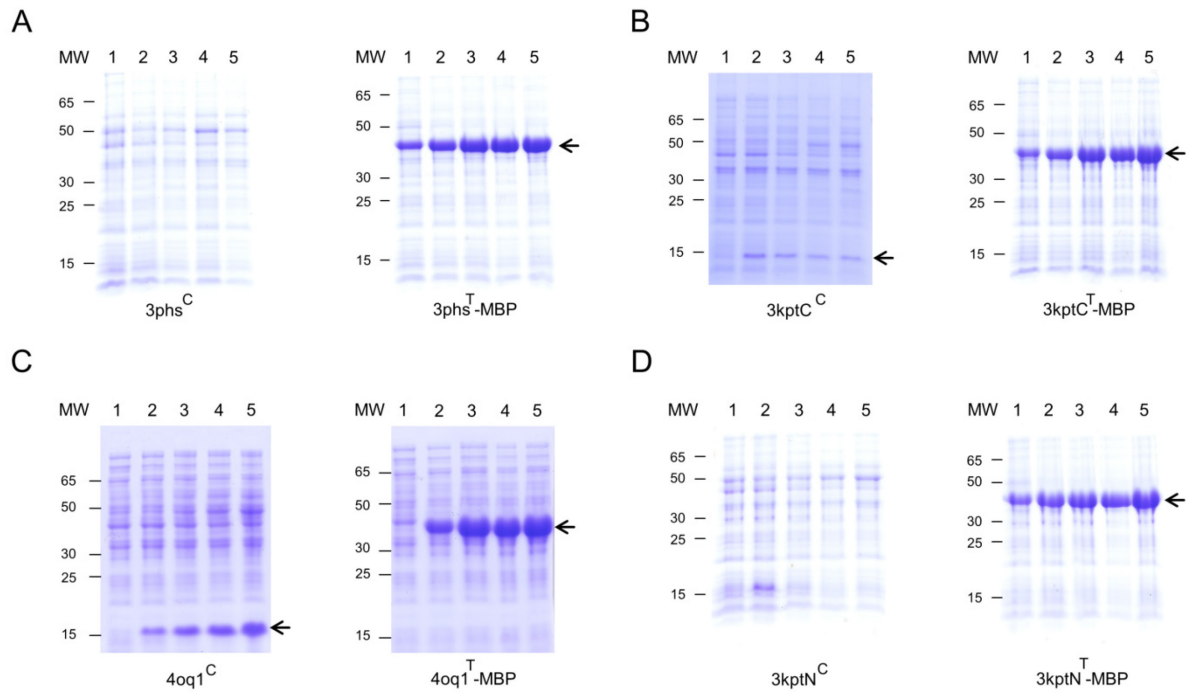

**S1 Fig: Time course of heterologous expression of catcher and tag proteins in M15 [pREP4] *E.coli* cells.** Expression of recombinant proteins was performed at 28°C with 180 rpm shaking for 4h. Once the cells reached an OD<sub>600</sub> of approx. 0.5, expression was induced with 1mM IPTG (0.5mM IPTG for 3kpt<sup>C</sup>) (final concentration). Recombinant protein expression was monitored by SDS-PAGE and Coomassie Brilliant blue staining of the samples (lane 1: 0h, lane 2: 1h, lane 3: 2h, lane 4: 3h, lane 5: 4h). An arrow indicates the product band. (A) Heterologous expression of 3phs<sup>C</sup> and 3phs<sup>T</sup>-MBP, (B) heterologous expression of 3kpt<sup>C</sup> and 3kpt<sup>T</sup>-MBP, (C) heterologous expression of 4oq1<sup>C</sup> and 4oq1<sup>T</sup>-MBP, (D) heterologous expression of 3kptN<sup>C</sup> and 3kptN<sup>T</sup>-MBP. Samples were adjusted to the same OD<sub>600</sub> and same volume was loaded on the gel. MW stands for molecular weight (kDa).
