# Supplementary material for: Probing the potential of CnaB-type domains for the design of tag/catcher systems
Source: PubMed Central journal article supplement (PMC5487036; doi:10.1371/journal.pone.0179740), 2017-06-27
Supplement: pone.0179740.s005.pdf [file pone.0179740.s005.pdf]

A

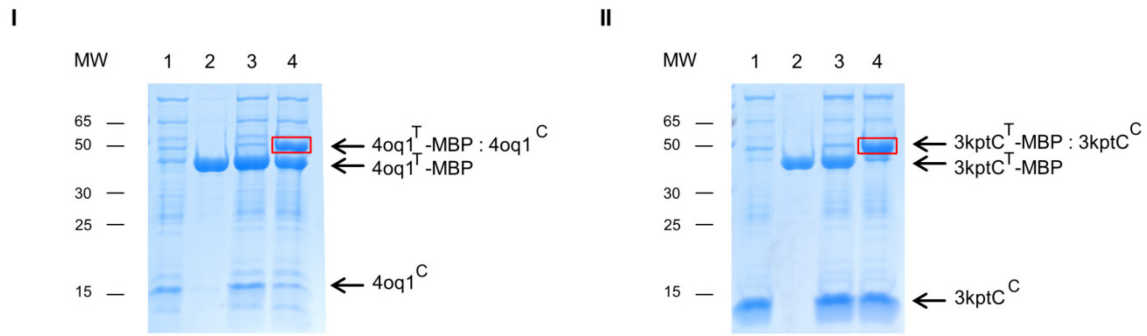

B

I

4oq1<sup>T</sup>-MBP

MRGSHHHHHHGSVTITV<sup>N</sup>QKLPRGNGSGESGKIEEGKLIWINGDKGYNGLAEVGGKFEKDTGIKVTV<sup>E</sup>HPDKL  
EEKFPQVAATGDGPDII<sup>F</sup>WAHDRF<sup>G</sup>GGYAQSGLLAEITPDKAFQDKLYPFTWD<sup>A</sup>VR<sup>Y</sup>NGKLIAYPIAVEALSLIYNKDL  
LLPNPPKTWEEIPALDKELKAKGKSALMFNLQEPYFTWPLIAADGGYAFKYENGYDIKDVGV<sup>D</sup>NAGAKAGL<sup>T</sup>FLV  
DLIKNHMNADTDYSIAEA<sup>F</sup>NKGETAMTINGPWAWSNIDTSKVN<sup>Y</sup>GVTVLPTFKGQPSKPFVGVLSAGINAASPN  
KELAKEFLENYLLTDEGLEAVNKDKPLGAVALKS<sup>Y</sup>EELAKDPRIAATMENAQKGEIMP<sup>N</sup>IPQMSAFWYAVR<sup>T</sup>AVIN  
AASGRQTVDEALKDAQTNSSS\*

4oq1<sup>C</sup>

MRGSHHHHHHGSTMTTKV<sup>L</sup>IKV<sup>D</sup>QDHNRL<sup>E</sup>GVGFKLVSVARDVSEKEVPLIGEYR<sup>Y</sup>SSSGQVGR<sup>T</sup>LYTDKNGEI  
FVTNLPLGN<sup>Y</sup>R<sup>F</sup>KEVEPLAGYAVTTLDTDVQL\*

II

3kptC<sup>T</sup>-MBP

MRGSHHHHHHGSTV<sup>K</sup>LTIEN<sup>N</sup>KSP<sup>T</sup>KSGSGESGKIEEGKLIWINGDKGYNGLAEVGGKFEKDTGIKVTV<sup>E</sup>HPDKLE  
EKFPQVAATGDGPDII<sup>F</sup>WAHDRF<sup>G</sup>GGYAQSGLLAEITPDKAFQDKLYPFTWD<sup>A</sup>VR<sup>Y</sup>NGKLIAYPIAVEALSLIYNKDLL  
PNPPKTWEEIPALDKELKAKGKSALMFNLQEPYFTWPLIAADGGYAFKYENGYDIKDVGV<sup>D</sup>NAGAKAGL<sup>T</sup>FLVDL  
IKNHMNADTDYSIAEA<sup>F</sup>NKGETAMTINGPWAWSNIDTSKVN<sup>Y</sup>GVTVLPTFKGQPSKPFVGVLSAGINAASPNKE  
LAKEFLENYLLTDEGLEAVNKDKPLGAVALKS<sup>Y</sup>EELAKDPRIAATMENAQKGEIMP<sup>N</sup>IPQMSAFWYAVR<sup>T</sup>AVINAA  
SGRQTVDEALKDAQTNSSS\*

3kptC<sup>C</sup>

MRGSHHHHHHGSTTGIIEL<sup>T</sup>KIDSANKNKLGA<sup>E</sup>FVLKDNNGKIVVAGKEVTGVSDENGVIKWSNIPYGDYQIFET  
KAPTYTKEDGKT<sup>S</sup>YQLLKDPIDVKIS\*

**S5 Fig: Mass spectrometric analysis of 4oq1 and 3kpt product band.** (A) Purified catcher (50µM final conc.) and tag-MBP (10µM final conc.) proteins were mixed at 25°C with shaking (500rpm) for 24h prior to boiling (10min, 95°C) and loading on a SDS-gel afterwards stained with brilliant blue colloidal concentrate (Sigma-Aldrich) (lane 1: catcher input (50µM), lane2: tag input (10µM), lane3: 0h sample, lane4: 24h sample). Corresponding product bands were cut out (red box). In-gel trypsin digest and subsequent MS analysis were performed (for further details see material and method). (B) Amino acid coverage of the gel-extracted and trypsin digested product band based on MS identified peptides (for details see S7 Table and S8 Table). Peptides identified by MS analysis are highlighted in green. The reactive amino acids are marked red.
