# Supplementary material for: Probing the potential of CnaB-type domains for the design of tag/catcher systems
Source: PubMed Central journal article supplement (PMC5487036; doi:10.1371/journal.pone.0179740), 2017-06-27
Supplement: pone.0179740.s006.pdf [file pone.0179740.s006.pdf]

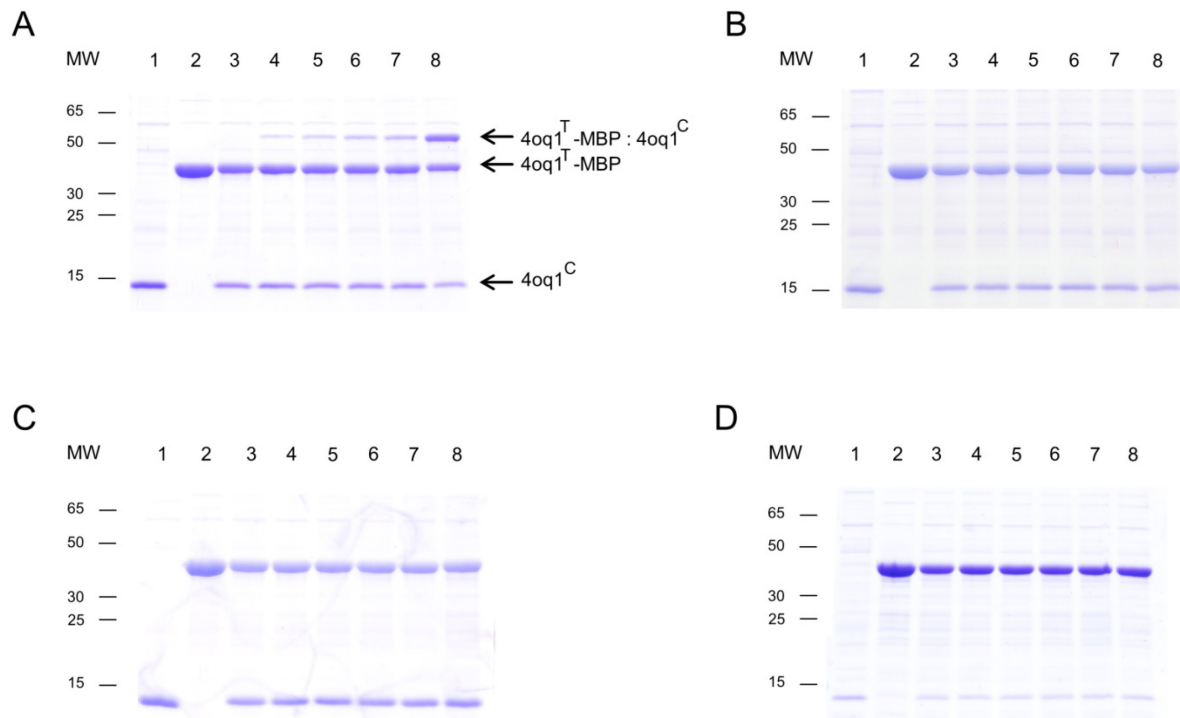

**S6 Fig: Covalent bond formation assays of 4oq1 active site mutants.**

(A)  $4oq1^C + 4oq1^T$ -MBP (wildtype interaction); (B)  $4oq1^C + 4oq1^T(N252A)$ -MBP; (C)  $4oq1^C(K155A) + 4oq1^T$ -MBP; (D)  $4oq1^C(E222Q) + 4oq1^T$ -MBP. The wildtype interaction showed a covalent product increasing over time whereas no covalent product was detected in the active site mutants. Comparative covalent bond formation assays were performed with  $15\mu\text{M}$  final concentration of the reactants. The reactive residues N252 in the  $4oq1^T$  and K155 and E222 in the  $4oq1^C$  were mutated and tested for covalent product formation via SDS-PAGE and subsequent Coomassie Brilliant blue staining. Samples were boiled at  $95^\circ\text{C}$  for 10min prior to gel loading. (A-D): lane 1: catcher input ( $30\mu\text{M}$ ), lane 2: tag input ( $30\mu\text{M}$ ), lane 3: 0h, lane 4: 1h, lane 5: 2h, lane 6: 3h, lane 7: 4h, lane 8: 24h). Same volume of samples were loaded. MW stands for molecular weight (kDa).
