# Supplementary material for: Probing the potential of CnaB-type domains for the design of tag/catcher systems
Source: PubMed Central journal article supplement (PMC5487036; doi:10.1371/journal.pone.0179740), 2017-06-27
Supplement: pone.0179740.s008.pdf [file pone.0179740.s008.pdf]

**A**

|     |    |                           |    |                          |
|-----|----|---------------------------|----|--------------------------|
| I   | N- | VTITVVNQKLPRGN            | -C | 4oq1 <sup>T</sup>        |
| II  | N- | <b>L</b> VTITVVNQKLPRGN   | -C | 4oq1 <sup>T</sup> (L)    |
| III | N- | <b>HQL</b> VTITVVNQKLPRGN | -C | 4oq1 <sup>T</sup> (HQL)  |
| IV  | N- | VTITVVNQKLP               | -C | 4oq1 <sup>T</sup> (ΔRGN) |

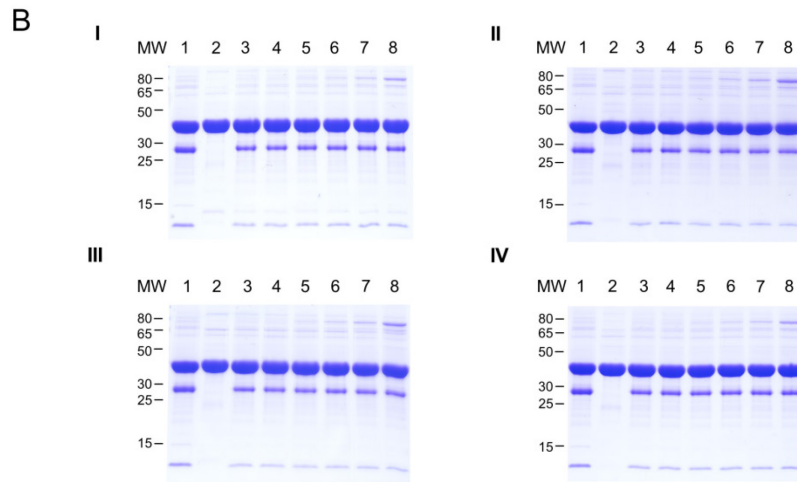

**S8 Fig: Rates of isopeptide bond formation of 4oq1<sup>T</sup>-MBP variants on the minute scale.** (A) Sequence alignment of different 4oq1<sup>T</sup>-MBP variants (I: 4oq1<sup>T</sup> wildtype (residues V246-N259), II: N-terminal L245 extension of 4oq1<sup>T</sup>, III: N-terminal H243-Q244-L245 extension of 4oq1<sup>T</sup>, IV: C-terminal R257-G258-N259 truncation of 4oq1<sup>T</sup>). (B) Comparative covalent intermolecular bond formation assay between different 4oq1<sup>T</sup>-MBP variants and mCherry-4oq1<sup>C</sup> (0min-30min). Purified 4oq1<sup>T</sup>-MBP variants and mCherry-4oq1<sup>C</sup> were mixed each at 15 μM (final conc.) for 30min at 25°C with shaking at 500 rpm before boiling (10min, 95°C) and SDS-PAGE with Coomassie staining. Interaction I: mCherry-4oq1<sup>C</sup> + 4oq1<sup>T</sup> (wildtype), interaction II: mCherry-4oq1<sup>C</sup> + 4oq1<sup>T</sup> (L), interaction III: mCherry-4oq1<sup>C</sup> + 4oq1<sup>T</sup> (HQL), interaction IV: mCherry-4oq1<sup>C</sup> + 4oq1<sup>T</sup> (ΔRGN). (lane 1: mCherry-catcher input (30μM), lane 2: tag input (30μM), lane 3: 0min, lane 4: 1min, lane 5: 3min, lane 6: 5min, lane 7: 10min, lane 8: 30min). Same volume was loaded on the gel. MW stands for molecular weight (kDa).
