# Supplementary material for: Probing the potential of CnaB-type domains for the design of tag/catcher systems
Source: PubMed Central journal article supplement (PMC5487036; doi:10.1371/journal.pone.0179740), 2017-06-27
Supplement: pone.0179740.s010.pdf [file pone.0179740.s010.pdf]

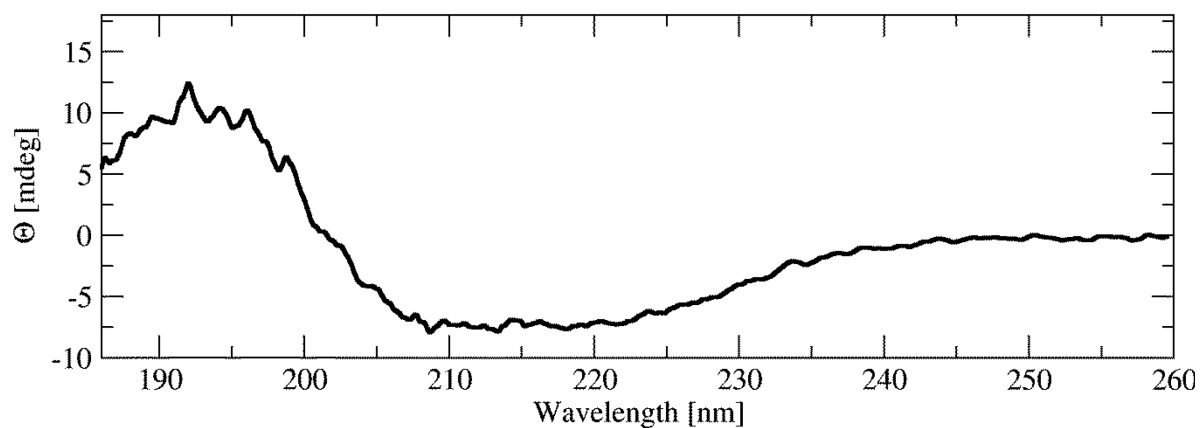

**S10 Fig: Far-UV CD-spectrum of 4oq1<sup>C</sup>.** The CD spectrum was measured at 20°C over the wavelength range of 185-260 nm. 4oq1<sup>C</sup> protein was used in a concentration of 0.3 mg/ml in 10mM sodium phosphate buffer pH 7. Per measured sample six scans were acquired and accumulated afterwards.
