# Supplementary material for: Probing the potential of CnaB-type domains for the design of tag/catcher systems
Source: PubMed Central journal article supplement (PMC5487036; doi:10.1371/journal.pone.0179740), 2017-06-27
Supplement: pone.0179740.s011.pdf [file pone.0179740.s011.pdf]

**S1 Table: Primers used in the present study**

|    |                                                                                                            |
|----|------------------------------------------------------------------------------------------------------------|
| 1  | 5' - CCTGGGATCCGTGAGCAAGGGCGAGGAGGATAAC - 3'                                                               |
| 2  | 5' - GGATCTGGTTCAGGCTCCGGAGAAATTAACGTGGCGCGGTG - 3'                                                        |
| 3  | 5' - CACCGCGCCACGTTTAATTTCTCCGGAGCCTGAACCAGATCC - 3'                                                       |
| 4  | 5' - CAGGGTCGACTTAAGAGGTAATGGTGCCATCTTC - 3'                                                               |
| 5  | 5' - GGATCTGGTTCAGGCTCCGGAACCATGACCACCAAAGTGAAAC - 3'                                                      |
| 6  | 5' - GTTCACTTTGGTGGTCATGGTCCGGAGCCTGAACCAGATCC - 3'                                                        |
| 7  | 5' - CAGGGTCGACTTACAGCTGCACATCGGTATCCAG - 3'                                                               |
| 8  | 5' - GGATCTGGTTCAGGCTCCGGATCTACCGGCGAATTAGATTTAC - 3'                                                      |
| 9  | 5' - GTAAATCTAATTCGCCGGTAGATCCGGAGCCTGAACCAGATCC - 3'                                                      |
| 10 | 5' - CAGGGTCGACTTATTCAATGGTCACCGCGGTTTC - 3'                                                               |
| 11 | 5' - GGATCTGGTTCAGGCTCCGGAACACCGGCATTATTGAATTAAC - 3'                                                      |
| 12 | 5' - GTTAATTCAATAATGCCGGTGGTCCGGAGCCTGAACCAGATCC - 3'                                                      |
| 13 | 5' - CAGGGTCGACTTAGCTAATTTTCACATCAATCG - 3'                                                                |
| 14 | 5' - CCTGGGATCCGTGACCATTACCGTGGTGAACCAGAAATTACCGCGTGGCAA<br>CGGTAGTGGTAAAAGTGGTAAAATCGAAGAAGGTAAACTGG - 3' |
| 15 | 5' - CAGGGTCGACTTACGAGCTCGAATTAGTCTGCGCGTCTTTCAGGGCTTCATC - 3'                                             |
| 16 | 5' - CCTGGGATCCCATCAGCTGGTGACCATTACCGTGGTGAACCAG - 3'                                                      |
| 17 | 5' - CCTGGGATCCCTGGTGACCATTACCGTGGTGAACC - 3'                                                              |
| 18 | 5' - CCTGGGATCCGTGACCATTACCGTGGTGAACCAGAAATTACCGGGTAGTGG<br>TGAAAGTGGTAAAATC - 3'                          |
| 19 | 5' - CCTGGGATCCACCGTGAAATTAACCATTGAAAACAACAAAAGCCCGACC<br>AAAGGTAGTGGTAAAAGTGGTAAAATCG - 3'                |
| 20 | 5' - CCTGGGATCCAACCAGACCGTGAAATTAACCATTGAAAAC - 3'                                                         |
| 21 | 5' - CCTGGGATCCACCGTGAAATTAACCATTGAAAACAACAAAAGCGGCTGG<br>ATTGGTAGTGGTAAAAGTGGTAAAATC - 3'                 |
| 22 | 5' - CCTGGGATCCGTGACCATTACCGTGGTGGCGCAGAAATTACCGCGTGGCAAC - 3'                                             |
| 23 | 5' - CAGGGTCGACTTACGAGCTCGAATTAGTCTGCGCGTCTTTCAGGGCTTCATC - 3'                                             |
| 24 | 5' - CCTGGGATCCACCATGACCACCAAAGTGAAACTGATTGCGGTGGATCAGGATCATAA<br>CCG - 3'                                 |
| 25 | 5' - CAGGGTCGACTTACAGCTGCACATCGGTATCCAG - 3'                                                               |
| 26 | 5' - CCTGGGATCCACCATGACCACC - 3'                                                                           |

|    |                                                                                               |
|----|-----------------------------------------------------------------------------------------------|
| 27 | 5' - CAGGGTCGACTTACAGCTGCACATCGGTATCCAGGGTGGTCACCGCATAGC<br>CCGCCAGCGGTTCCACCTGTTTAAAACG - 3' |
| 28 | 5' - CCTGGGATCCACCGTGAAATTAACCATTGAAGCGAACAAAAGCCCGACCAAAGGTAG - 3'                           |
| 29 | 5' - CAGGGTCGACTTACGAGCTCGAATTAGTCTGCGCGTCTTTCAGGGCTTCATC - 3'                                |
| 30 | 5' - CCTGGGATCCACCACCGGCATTATTGAATTAACCGCGATTGATAGCGCG<br>AACAAAAAC - 3'                      |
| 31 | 5' - CAGGGTCGACTTAGCTAATTTTCACATCAATCG - 3'                                                   |
| 32 | 5' - GTATGGCGATTATCAGATTTTTCAGACCAAAGCGCCGACCTATAC - 3'                                       |
| 33 | 5' - GTTTCGCCACCTCTGACTTGAG - 3'                                                              |
| 34 | 5' - CTCAAGTCAGAGGTGGCGAAAC - 3'                                                              |
| 35 | 5' - GTATAGGTCGGCGCTTTGGTCTGAAAAATCTGATAATCGCCATAC - 3'                                       |
