# Supplementary material for: Probing the potential of CnaB-type domains for the design of tag/catcher systems
Source: PubMed Central journal article supplement (PMC5487036; doi:10.1371/journal.pone.0179740), 2017-06-27
Supplement: pone.0179740.s012.pdf [file pone.0179740.s012.pdf]

**S2 Table: Cloning scheme for mCherry-GSGSGSG-Catcher constructs**

| <b>mCherry- -3kptC<sup>c</sup></b>                                   | <b>mCherry --3kptN<sup>c</sup></b>                                   | <b>mCherry--3phs<sup>c</sup></b>                                      | <b>mCherry- -4oq1<sup>c</sup></b>                                    |
|----------------------------------------------------------------------|----------------------------------------------------------------------|-----------------------------------------------------------------------|----------------------------------------------------------------------|
| PCR1:<br>1 + 12;<br>mCherry as template                              | PCR1:<br>1 + 3;<br>mCherry as template                               | PCR1:<br>1 + 9;<br>mCherry as template                                | PCR1:<br>1 + 6;<br>mCherry as template                               |
| PCR2:<br>11 + 13;<br>Synthetic gene as<br>template                   | PCR2:<br>2 + 4;<br>Synthetic gene as<br>template                     | PCR2:<br>8 + 10;<br>Synthetic gene as<br>template                     | PCR2:<br>5 + 7;<br>Synthetic gene as<br>template                     |
| Overlap PCR:<br>1 +13<br>Products from PCR1<br>and PCR2 as templates | Overlap PCR:<br>1 + 4<br>Products from PCR1<br>and PCR2 as templates | Overlap PCR:<br>1 + 10<br>Products from PCR1<br>and PCR2 as templates | Overlap PCR:<br>1 + 7<br>Products from PCR1<br>and PCR2 as templates |

Number of primers used correlate with the primer list in S1 Table.
