# Supplementary material for: Probing the potential of CnaB-type domains for the design of tag/catcher systems
Source: PubMed Central journal article supplement (PMC5487036; doi:10.1371/journal.pone.0179740), 2017-06-27
Supplement: pone.0179740.s013.pdf [file pone.0179740.s013.pdf]

**S3 Table: Cloning scheme for 4oq1<sup>T</sup>-MBP variants (GSGESG linker and MBP sequence from pMAL-c2 vector)**

| <b>4oq1<sup>T</sup>(wildtype)</b>                             | <b>4oq1<sup>T</sup>(L)</b>                                  | <b>4oq1<sup>T</sup>(HQL)</b>                                | <b>4oq1<sup>T</sup>(ΔRGN)</b>                               |
|---------------------------------------------------------------|-------------------------------------------------------------|-------------------------------------------------------------|-------------------------------------------------------------|
| PCR: 14 + 15<br>4oq1 <sup>T</sup> -GSGSGSG-MBP<br>as template | PCR: 17 + 15<br>4oq1 <sup>T</sup> (wildtype) as<br>template | PCR: 16 + 15<br>4oq1 <sup>T</sup> (wildtype) as<br>template | PCR: 18 + 15<br>4oq1 <sup>T</sup> (wildtype) as<br>template |

Number of primers used correlate with the primer list in S1 Table.
