# Supplementary material for: Probing the potential of CnaB-type domains for the design of tag/catcher systems
Source: PubMed Central journal article supplement (PMC5487036; doi:10.1371/journal.pone.0179740), 2017-06-27
Supplement: pone.0179740.s014.pdf [file pone.0179740.s014.pdf]

**S4 Table: Cloning scheme for 3kptC<sup>T</sup>-MBP variants (GSGESG linker and MBP sequence from pMAL-c2 vector)**

| <b>3kptC<sup>T</sup>(wildtype)</b>                          | <b>3kptC<sup>T</sup>(NQ)</b>                                    | <b>3kptC<sup>T</sup>(GWI)</b>                                   |
|-------------------------------------------------------------|-----------------------------------------------------------------|-----------------------------------------------------------------|
| PCR: 19 + 15<br>3kptC <sup>T</sup> -GSGSGSG-MBP<br>template | as<br>PCR: 20 + 15<br>3kptC <sup>T</sup> (wildtype) as template | as<br>PCR: 21 + 15<br>3kptC <sup>T</sup> (wildtype) as template |

Number of primers used correlate with the primer list in S1 Table.
