# Supplementary material for: Probing the potential of CnaB-type domains for the design of tag/catcher systems
Source: PubMed Central journal article supplement (PMC5487036; doi:10.1371/journal.pone.0179740), 2017-06-27
Supplement: pone.0179740.s015.pdf [file pone.0179740.s015.pdf]

**S5 Table: Cloning scheme for non-reactive 4oq1 variants (GSGESG linker and MBP sequence from pMAL-c2 vector)**

| <b>4oq1<sup>T</sup>(N252A)</b>                               | <b>4oq1<sup>C</sup>(K155A)</b>                | <b>4oq1<sup>C</sup>(E222Q)</b>                |
|--------------------------------------------------------------|-----------------------------------------------|-----------------------------------------------|
| PCR: 22 + 23<br>4oq1 <sup>T</sup> -GSGESG-MBP as<br>template | PCR: 24 + 25<br>4oq1 <sup>C</sup> as template | PCR: 26 + 27<br>4oq1 <sup>C</sup> as template |

Number of primers used correlate with the primer list in S1 Table.
