# Supplementary material for: Probing the potential of CnaB-type domains for the design of tag/catcher systems
Source: PubMed Central journal article supplement (PMC5487036; doi:10.1371/journal.pone.0179740), 2017-06-27
Supplement: pone.0179740.s016.pdf [file pone.0179740.s016.pdf]

**S6 Table: Cloning scheme for non-reactive 3kptC variants (GSGESG linker and MBP sequence from pMAL-c2 vector)**

| <b>3kptC<sup>T</sup>(N512A)</b>                               | <b>3kptC<sup>C</sup>(K417A)</b>                | <b>3kptC<sup>C</sup>(E472Q)</b>                                                     |
|---------------------------------------------------------------|------------------------------------------------|-------------------------------------------------------------------------------------|
| PCR: 28 + 29<br>3kptC <sup>T</sup> -GSGESG-MBP as<br>template | PCR: 30 + 31<br>3kptC <sup>C</sup> as template | PCR1: 32 + 33<br>PCR2: 34 + 35<br>3kptC <sup>C</sup> in pQE-9 vector as<br>template |

Number of primers used correlate with the primer list in S1 Table.
