# Supplementary material for: Probing the potential of CnaB-type domains for the design of tag/catcher systems
Source: PubMed Central journal article supplement (PMC5487036; doi:10.1371/journal.pone.0179740), 2017-06-27
Supplement: pone.0179740.s019.pdf [file pone.0179740.s019.pdf]

## S1 Text: Sequences

### Synthetic genes:

#### 3phs<sup>C</sup>:

CCTGGGATCCTCTACCGGCGAATTAGATTTACTGAAAGTGGGCGTGGATGGCGATACCAAAAAACCGC  
TGGCGGGCGTGGTGTTTGAACTGTATGAAAAAACGGCCGTACCCCGATTTCGTGTGAAAAACGGCGTG  
CATTCTCAGGATATTGATGCGGGCGAAACATTTAGAAACCGATTCTTCTGGCCATATTTCGTATTTCTGG  
CCTGATTCATGGCGATTATGTGTTAAAAGAAATTGAAACCCAGTCTGGCTATCAGATTGGCCAGGCGG  
AAACCGCGGTGACCATTGAATACCCTTATGATGTGCCAGACTACGCATAAGTCGACCCTG

#### 3phs<sup>T</sup>-MBP:

CCTGGGATCCAAAACCGTGACCGTGACCATTGAAAACAAAAAGTGCCGACCCCGAAAGGATCTGGTT  
CAGGCTCCGGAAAAATCGAAGAAGGTAAACTGGTAATCTGGATTAACGGCGATAAAGGCTATAACGGT  
CTCGCTGAAGTCGGTAAGAAATTCGAGAAAGATACCGGAATTAAAGTCACCGTTGAGCATCCGGATAA  
ACTGGAAGAGAAATCCCACAGGTTGCGGCAACTGGCGATGGCCCTGACATTATCTTCTGGGCACACG  
ACCGCTTTGGTGGCTACGCTCAATCTGGCCTGTTGGCTGAAATCACCCCGGACAAAGCGTTCAGGAC  
AAGCTGTATCCGTTTACCTGGGATGCCGTACGTTACAACGGCAAGCTGATTGCTTACCCGATCGCTGT  
TGAAGCGTTATCGCTGATTTATAACAAAGATCTGCTGCCGAACCCGCCAAAAACCTGGGAAGAGATCC  
CGGCGCTGGATAAAAGAACTGAAAGCGAAAGGTAAGAGCGCGCTGATGTTCAACCTGCAAGAACCGTAC  
TTCACCTGGCCGCTGATTGCTGCTGACGGGGTTATGCGTTCAAGTATGAAAACGGCAAGTACGACAT  
TAAAGACGTGGGCGTGGATAACGCTGGCGCGAAAGCGGGTCTGACCTTCTGTTGACCTGATTAATA  
ACAAACACATGAATGCAGACACCGATTACTCCATCGCAGAAGCTGCCTTTAATAAAGGCGAAACAGCG  
ATGACCATCAACGGCCCGTGGGCATGGTCCAACATCGACACCAGCAAAGTGAATTATGGTGTAAACGGT  
ACTGCCGACCTTCAAGGTTCAACCATCAAACCGTTCGTTGGCGTGCTGAGCGCAGGTATTAACGCCG  
CCAGTCCGAACAAAGAGCTGGCAAAAGAGTTCCTCGAAAACCTATCTGCTGACTGATGAAGGTCTGGAA  
GCGGTTAATAAAGACAAACCGCTGGGTGCCGTAGCGCTGAAGTCTTACGAGGAAGAGTTGGCGAAAGA  
TCCACGTATTGCCGCCACCATGGAAAACGCCAGAAAGGTGAAATCATGCCGAACATCCCGCAGATGT  
CCGCTTTCTGGTATGCCGTGCGTACTGCGGTGATCAACGCCGCCAGCGGTCGTCAGACTGTCGATGAA  
GCCCTGAAAGACGCGCAGACTTAAGTCGACCCTG

#### 3kpt<sup>C</sup>:

CCTGGGATCCACCACCGGCATTATTGAATTAACCAAATTTGATAGCGCGAACAAAAACAAATTTAAAG  
GCGCGGAATTTGTGCTGAAAGATAACAACGGCAAATTTGTGGTGGTGGCGGGCAAAGAAGTGACCGGC  
GTGTCTGATGAAAACGGCGTGATTAAATGGTCTAACATTCCGTATGGCGATTATCAGATTTTTGAAAC  
CAAAGCGCCGACCTATACCAAAGAAGATGGCACCAAACCTCTTATCAGTTATTTAAAGATCCGATTG  
ATGTGAAAATTAGCTACCCTTATGATGTGCCAGACTACGCATAAGTCGACCCTG

### 3kpt<sup>C</sup>-MBP:

CCTGGGATCCACCGTGAAATTAACCATTGAAAACAACAAAAGCCCGACCAAAGGATCTGGTTCAGGCT  
CCGGAAAAATCGAAGAAGGTAAACTGGTAATCTGGATTAACGGCGATAAAGGCTATAACGGTCTCGCT  
GAAGTCGGTAAGAAATTCGAGAAAGATAACCGAATTAAGTCACCGTTGAGCATCCGGATAAACTGGA  
AGAGAAATTCACAGGTTGCGGCAACTGGCGATGGCCCTGACATTATCTTCTGGGCACACGACCGCT  
TTGGTGGCTACGCTCAATCTGGCCTGTTGGCTGAAATCACCCCGACAAAAGCGTTCCAGGACAAGCTG  
TATCCGTTTACCTGGGATGCCGTACGTTACAACGGCAAGCTGATTGCTTACCCGATCGCTGTTGAAGC  
GTTATCGCTGATTTATAACAAAGATCTGCTGCCGAACCCGCCAAAAACCTGGGAAGAGATCCCGGCGC  
TGGATAAAGAAGCTGAAAGCGAAAGGTAAGAGCGCGCTGATGTTCAACCTGCAAGAACCGTACTTCACC  
TGGCCGCTGATTGCTGCTGACGGGGGTTATGCGTTCAAGTATGAAAACGGCAAGTACGACATTAAGA  
CGTGGGCGTGGATAACGCTGGCGCGAAAGCGGGTCTGACCTTCCTGGTTGACCTGATTAAAAACAAAC  
ACATGAATGCAGACACCGATTACTCCATCGCAGAAGCTGCCTTTAATAAAGGCGAAACAGCGATGACC  
ATCAACGGCCCGTGGGCATGGTCCAACATCGACACCAGCAAAGTGAATTATGGTGTAAACGGTACTGCC  
GACCTTCAAGGGTCAACCATCCAAACCGTTTCGTTGGCGTGCTGAGCGCAGGTATTAACGCCGCCAGTC  
CGAACAAAGAGCTGGCAAAGAGTTCCCTCGAAAACCTATCTGCTGACTGATGAAGGTCTGGAAGCGGTT  
AATAAAGACAAACCGCTGGGTGCCGTAGCGCTGAAGTCTTACGAGGAAGAGTTGGCGAAAGATCCACG  
TATTGCCGCCACCATGGAAAACGCCAGAAAGGTGAAATCATGCCGAACATCCCGCAGATGTCCGCTT  
TCTGGTATGCCGTGCGTACTGCGGTGATCAACGCCGCCAGCGGTCGTCAGACTGTCGATGAAGCCCTG  
AAAGACGCGCAGACTTAAGTCGACCCTG

### 3kpt<sup>C</sup>:

CCTGGGATCCGAAATTAACGTTGGCGCGGTGGATTTAATTAATAAACCAGCGTGAACGAAAAAGCGTTAG  
CGGGCGCGGTGTTTTCTTTATTTAAAAAAGATGGCACCGAAGTAAAAAAGAATTAGCGACCGATGCG  
AACGGCCATATTCGTGTGCAGGGCTTAGAATATGGCGAATATTTTTCAGGAAACCAAAGCGCCGAA  
AGGCTATGTGATTGATCCGACCAAACGTGAATTTTTTGTGAAAAACTCTGGCACCATTAACGAAGATG  
GCACCATTACCTCTTACCCTTATGATGTGCCAGACTACGCATAAGTCGACCCTG

### 3kpt<sup>N</sup>-MBP:

CCTGGGATCCGTTGGTGAATTTGAAGTAAAAACAACGAAGAACCGACCATTGATGGATCTGGTTCAG  
GCTCCGGAAAAATCGAAGAAGGTAAACTGGTAATCTGGATTAACGGCGATAAAGGCTATAACGGTCTC  
GCTGAAGTCGGTAAGAAATTCGAGAAAGATAACCGAATTAAGTCACCGTTGAGCATCCGGATAAACT  
GGAAGAGAAATTCACAGGTTGCGGCAACTGGCGATGGCCCTGACATTATCTTCTGGGCACACGACC  
GCTTTGGTGGCTACGCTCAATCTGGCCTGTTGGCTGAAATCACCCCGACAAAAGCGTTCCAGGACAAG  
CTGTATCCGTTTACCTGGGATGCCGTACGTTACAACGGCAAGCTGATTGCTTACCCGATCGCTGTTGA  
AGCGTTATCGCTGATTTATAACAAAGATCTGCTGCCGAACCCGCCAAAAACCTGGGAAGAGATCCCGG  
CGCTGGATAAAGAAGCTGAAAGCGAAAGGTAAGAGCGCGCTGATGTTCAACCTGCAAGAACCGTACTTC  
ACCTGGCCGCTGATTGCTGCTGACGGGGGTTATGCGTTCAAGTATGAAAACGGCAAGTACGACATTA  
AGACGTGGGCGTGGATAACGCTGGCGCGAAAGCGGGTCTGACCTTCCTGGTTGACCTGATTAAAAACA  
AACACATGAATGCAGACACCGATTACTCCATCGCAGAAGCTGCCTTTAATAAAGGCGAAACAGCGATG  
ACCATCAACGGCCCGTGGGCATGGTCCAACATCGACACCAGCAAAGTGAATTATGGTGTAAACGGTACT  
GCCGACCTTCAAGGGTCAACCATCCAAACCGTTTCGTTGGCGTGCTGAGCGCAGGTATTAACGCCGCCA  
GTCCGAACAAAGAGCTGGCAAAGAGTTCCCTCGAAAACCTATCTGCTGACTGATGAAGGTCTGGAAGCG  
GTTAATAAAGACAAACCGCTGGGTGCCGTAGCGCTGAAGTCTTACGAGGAAGAGTTGGCGAAAGATCC  
ACGTATTGCCGCCACCATGGAAAACGCCAGAAAGGTGAAATCATGCCGAACATCCCGCAGATGTCCG  
CTTTCTGGTATGCCGTGCGTACTGCGGTGATCAACGCCGCCAGCGGTCGTCAGACTGTCGATGAAGCC  
CTGAAAGACGCGCAGACTTAAGTCGACCCTG

4oq1<sup>C</sup>:

CCTGGGATCCACCATGACCACCAAAGTGAAACTGATTAAAGTGGATCAGGATCATAACCGTTTAGAAG  
GCGTGGGCTTTAAATTAGTGTCTGTGGCGCGTGATGTGTCTGAAAAAGAAGTGCCGTTAATTGGCGAA  
TATCGTTATAGCTCTTCTGGCCAGGTGGGCCGTACCCTGTATACCGATAAAAACGGCGAAATTTTTGT  
GACCAACCTGCCGCTGGGCAACTATCGTTTTAAAGAAGTGAACCGCTGGCGGGCTATGCGGTGACCA  
CCCTGGATACCGATGTGCAGCTGTACCCTTATGATGTGCCAGACTACGCATAAGTCGACCCTG

4oq1<sup>T</sup>-MBP:

CCTGGGATCCGTGACCATTACCGTGGTGAACCAGAAATTACCGCGTGGCAACGGATCTGGTTCAGGCT  
CCGGAAAAATCGAAGAAGGTAAACTGGTAATCTGGATTAACGGCGATAAAGGCTATAACGGTCTCGCT  
GAAGTCGGTAAGAAATTCGAGAAAGATACCGGAATTAAGTACCGTTGAGCATCCGGATAAACTGGA  
AGAGAAATTCACAGGTTGCGGCAACTGGCGATGGCCCTGACATTATCTTCTGGGCACACGACCGCT  
TTGGTGGCTACGCTCAATCTGGCCTGTTGGCTGAAATCACCCGGACAAAGCGTTCCAGGACAAGCTG  
TATCCGTTTACCTGGGATGCCGTACGTTACAACGGCAAGCTGATTGCTTACCCGATCGCTGTTGAAGC  
GTTATCGCTGATTTATAACAAAGATCTGCTGCCGAACCCGCCAAAAACCTGGGAAGAGATCCCGGCGC  
TGGATAAAGAAGTCAAAGCGAAAGGTAAGAGCGCGCTGATGTTCAACCTGCAAGAACCGTACTTCACC  
TGGCCGCTGATTGCTGCTGACGGGGGTTATGCGTTCAAGTATGAAAACGGCAAGTACGACATTAAGA  
CGTGGGCGTGGATAACGCTGGCGCGAAAGCGGGTCTGACCTTCTGGTTGACCTGATTAAAAACAAC  
ACATGAATGCAGACACCGATTACTCCATCGCAGAAGCTGCCTTTAATAAAGGCGAAACAGCGATGACC  
ATCAACGGCCCGTGGGCATGGTCCAACATCGACACCAGCAAAGTGAATTATGGTGTAAACGGTACTGCC  
GACCTTCAAGGGTCAACCATCCAAACCGTTTCGTTGGCGTGCTGAGCGCAGGTATTAACGCCGCCAGTC  
CGAACAAAGAGCTGGCAAAAGAGTTCCCTCGAAAACCTATCTGCTGACTGATGAAGGTCTGGAAGCGGTT  
AATAAAGACAAACCGCTGGGTGCCGTAGCGCTGAAGTCTTACGAGGAAGAGTTGGCGAAAGATCCACG  
TATTGCCGCCACCATGAAAACGCCAGAAAGTGAATCATGCCGAACATCCCGCAGATGTCCGCTT  
TCTGGTATGCCGTGCGTACTGCGGTGATCAACGCCGCCAGCGTTCGTGAGACTGTGATGAAGCCCTG  
AAAGACGCGCAGACTTAAGTCGACCCTG

Overlap-PCR products:

mCherry-3kptN<sup>C</sup>:

CCTGGGATCCGTGAGCAAGGGCGAGGAGGATAACATGGCCATCATCAAGGAGTTCATGCGCTTCAAGG  
TGCACATGGAGGGCTCCGTGAACGGCCACGAGTTCGAGATCGAGGGCGAGGGCGAGGGCCGCCCTAC  
GAGGGCACCCAGACCGCAAGCTGAAGGTGACCAAGGGTGGCCCCCTGCCCTTCGCCTGGGACATCCT  
GTCCCCTCAGTTTATGTACGGCTCCAAGGCCTACGTGAAGCACCCCGCCGACATCCCCGACTACTTGA  
AGCTGTCTTCCCCGAGGGCTTCAAGTGGGAGCGCGTGATGAACTTCGAGGACGGCGGGCTGGTGACC  
GTGACCCAGGACTCCTCCCTGCAGGACGGCGAGTTCATCTACAAGGTGAAGCTGCGCGGCACCAACTT  
CCCCCTCGACGGCCCCGTAATGCAGAAGAAGACCATGGGCTGGGAGGCCTCCTCCGAGCGGATGTACC  
CCGAGGACGGCGCCCTGAAGGGCGAGATCAAGCAGAGGCTGAAGCTGAAGGACGGCGGCCACTACGAC  
GCTGAGGTCAAGACCACCTACAAGGCCAAGAAGCCCGTGCAGCTGCCGGCGCCTACAACGTCAACAT  
CAAGTTGGACATCACCTCCCACAACGAGGACTACCCATCGTGGAACAGTACGAACGCGCCGAGGGCC  
GCCACTCCACCGGCGGCATGGACGAGCTGTACAAGGGATCTGGTTCAGGCTCCGGAGAAATTAACGT  
GGCGCGGTGGATTTAATTAACCGGCGTGAACGAAAAGCGTTAGCGGGCGCGGTGTTTTCTTTATT  
TAAAAAAGATGGCACCGAAGTGA AAAAAGAATTAGCGACCGATGCGAACGGCCATATTCGTGTGCAGG  
GCTTAGAATATGGCGAATATTATTTTCAGGAAACCAAGCGCCGAAAGGCTATGTGATTGATCCGACC  
AAACGTGAATTTTTTGTGAAAACCTCTGGCACCATTAACGAAGATGGCACCATTACCTCTTAAGTCGA  
CCCTG

### mCherry-4oq1<sup>c</sup>:

CCTGGGATCCGTGAGCAAGGGCGAGGAGGATAACATGGCCATCATCAAGGAGTTCATGCGCTTCAAGG  
TGCACATGGAGGGCTCCGTGAACGGCCACGAGTTCGAGATCGAGGGCGAGGGCGAGGGCCGCCCTAC  
GAGGGCACCCAGACCGCCAAGCTGAAGGTGACCAAGGGTGGCCCCCTGCCCTTCGCCTGGGACATCCT  
GTCCCCCTCAGTTCATGTACGGCTCCAAGGCCTACGTGAAGCACCCCGCCGACATCCCCGACTACTTGA  
AGCTGTCCTTCCCCGAGGGCTTCAAGTGGGAGCGCGTGATGAACTTCGAGGACGGCGGGCGTGGTGACC  
GTGACCCAGGACTCCTCCCTGCAGGACGGCGAGTTCATCTACAAGGTGAAGCTGCGCGGCACCAACTT  
CCCCCTCCGACGGCCCCGTAATGCAGAAGAAGACCATGGGCTGGGAGGCCTCCTCCGAGCGGATGTACC  
CCGAGGACGGCGCCCTGAAGGGCGAGATCAAGCAGAGGCTGAAGCTGAAGGACGGCGGGCCACTACGAC  
GCTGAGGTCAAGACCACCTACAAGGCCAAGAAGCCCGTGCAGCTGCCCGGCGCCTACAACGTCAACAT  
CAAGTTGGACATCACCTCCCACAACGAGGACTACACCATCGTGGAACAGTACGAACGCGCCGAGGGCC  
GCCACTCCACCGGGCGGCATGGACGAGCTGTACAAGGGATCTGGTTCAGGCTCCGGAACCATGACCACC  
AAAGTGAAACTGATTAAAGTGGATCAGGATCATAACCGTTTGAAGGCGTGGGCTTTAAATTAGTGTC  
TGTGGCGCGTGATGTGTCTGAAAAAGAAGTGCCGTTAATTGGCGAATATCGTTATAGCTCTTCTGGCC  
AGGTGGGCCGTACCTGTATACCGATAAAAAACGGCGAAATTTTGTGACCAACCTGCCGCTGGGCAAC  
TATCGTTTTAAAGAAGTGAACCGCTGGCGGGCTATGCGGTGACCACCCTGGATACCGATGTGCAGCT  
GTAAGTCGACCCTG

### mCherry-3phs<sup>c</sup>:

CCTGGGATCCGTGAGCAAGGGCGAGGAGGATAACATGGCCATCATCAAGGAGTTCATGCGCTTCAAGG  
TGCACATGGAGGGCTCCGTGAACGGCCACGAGTTCGAGATCGAGGGCGAGGGCGAGGGCCGCCCTAC  
GAGGGCACCCAGACCGCCAAGCTGAAGGTGACCAAGGGTGGCCCCCTGCCCTTCGCCTGGGACATCCT  
GTCCCCCTCAGTTCATGTACGGCTCCAAGGCCTACGTGAAGCACCCCGCCGACATCCCCGACTACTTGA  
AGCTGTCCTTCCCCGAGGGCTTCAAGTGGGAGCGCGTGATGAACTTCGAGGACGGCGGGCGTGGTGACC  
GTGACCCAGGACTCCTCCCTGCAGGACGGCGAGTTCATCTACAAGGTGAAGCTGCGCGGCACCAACTT  
CCCCCTCCGACGGCCCCGTAATGCAGAAGAAGACCATGGGCTGGGAGGCCTCCTCCGAGCGGATGTACC  
CCGAGGACGGCGCCCTGAAGGGCGAGATCAAGCAGAGGCTGAAGCTGAAGGACGGCGGGCCACTACGAC  
GCTGAGGTCAAGACCACCTACAAGGCCAAGAAGCCCGTGCAGCTGCCCGGCGCCTACAACGTCAACAT  
CAAGTTGGACATCACCTCCCACAACGAGGACTACACCATCGTGGAACAGTACGAACGCGCCGAGGGCC  
GCCACTCCACCGGGCGGCATGGACGAGCTGTACAAGGGATCTGGTTCAGGCTCCGGATCTACCGGCGAA  
TTAGATTTACTGAAAAGTGGGCGTGGATGGCGATACCAAAAAACCGCTGGCGGGCGTGGTGTTTGAACT  
GTATGAAAAAACGGCCGTACCCCGATTTCGTGTGAAAAACGGCGTGCATTCTCAGGATATTGATGCGG  
CGAAACATTTAGAAACCGATTCTTCTGGCCATATTTCGTATTTCTGGCCTGATTCATGGCGATTATGTG  
TTAAAAGAAATTGAAACCCAGTCTGGCTATCAGATTGGCCAGGCGGAAACCGCGGTGACCATTGAATA  
AGTCGACCCTG

mCherry-3kptC<sup>c</sup>:

CCTGGGATCCGTGAGCAAGGGCGAGGAGGATAACATGGCCATCATCAAGGAGTTCATGCGCTTCAAGG  
TGCACATGGAGGGCTCCGTGAACGGCCACGAGTTCGAGATCGAGGGCGAGGGCGAGGGCCGCCCTAC  
GAGGGCACCCAGACCGCCAAGCTGAAGGTGACCAAGGGTGGCCCCCTGCCCTTCGCCTGGGACATCCT  
GTCCCCTCAGTTCATGTACGGCTCCAAGGCCTACGTGAAGCACCCCGCCGACATCCCCGACTACTTGA  
AGCTGTCCTTCCCCGAGGGCTTCAAGTGGGAGCGCGTGATGAACTTCGAGGACGGCGGGCGTGGTGACC  
GTGACCCAGGACTCCTCCCTGCAGGACGGCGAGTTCATCTACAAGGTGAAGCTGCGCGGCACCAACTT  
CCCCCTCCGACGGCCCCGTAATGCAGAAGAAGACCATGGGCTGGGAGGCCTCCTCCGAGCGGATGTACC  
CCGAGGACGGCGCCCTGAAGGGCGAGATCAAGCAGAGGCTGAAGCTGAAGGACGGCGGGCCACTACGAC  
GCTGAGGTCAAGACCACCTACAAGGCCAAGAAGCCCCTGCAGCTGCCCGGCGCTACAACGTCAACAT  
CAAGTTGGACATCACCTCCCACAACGAGGACTACACCATCGTGGAACAGTACGAACGCGCCGAGGGCC  
GCCACTCCACCGGCGGCATGGACGAGCTGTACAAGGGATCTGGTTCAGGCTCCGGAACCACCGGCATT  
ATTGAATTAACAAAATTGATAGCGCAACAAAAACAAATTTAAAGGCGCGGAATTTGTGCTGAAAGA  
TAACAACGGCAAAAATTGTGGTGGTGGCGGGCAAAGAAGTGACCGGCGTGTCTGATGAAAACGGCGTGA  
TTAAATGGTCTAACATTCCGTATGGCGATTATCAGATTTTTGAAACCAAAGCGCCGACCTATACCAA  
GAAGATGGCACCAAAACCTCTTATCAGTTATTTAAAGATCCGATTGATGTGAAAATTAGCTAAGTCGA  
CCCTG

4oq1<sup>T</sup>-MBP variants:

4oq1<sup>T</sup> (GSGESG linker and MBP from pMAL-c2 vector):

CCTGGGATCCGTGACCATTACCGTGGTGAACCAGAAATTACCGCGTGGCAACGGTAGTGGTGAAGTG  
GTAAAAATCGAAGAAGGTAAACTGGTAATCTGGATTAACGGCGATAAAGGCTATAACGGTCTCGCTGAA  
GTCGGTAAGAAATTCGAGAAAGATACCGGAATTAAAGTACCGTTGAGCATCCGGATAAACTGGAAGA  
GAAATCCCACAGGTTGCGGCAACTGGCGATGGCCCTGACATTATCTTCTGGGCACACGACCGCTTTG  
GTGGCTACGCTCAATCTGGCCTGTTGGCTGAAATCACCCCGGACAAAGCGTTCAGGACAAGCTGTAT  
CCGTTTACCTGGGATGCCGTACGTTACAACGGCAAGCTGATTGCTTACCCGATCGCTGTTGAAGCGTT  
ATCGCTGATTTATAACAAAGATCTGCTGCCGAACCCGCCAAAAACCTGGGAAGAGATCCCGGCGCTGG  
ATAAAGAAGTGAAGCGAAAGGTAAGAGCGCGCTGATGTTCAACCTGCAAGAACCGTACTTCACCTGG  
CCGCTGATTGCTGCTGACGGGGTTATGCGTTCAAGTATGAAAACGGCAAGTACGACATTAAGACGT  
GGGCGTGGATAACGCTGGCGCGAAAGCGGGTCTGACCTTCCCTGGTTGACCTGATTA AAAACAAACACA  
TGAATGCAGACACCGATTACTCCATCGCAGAAGCTGCCTTTAATAAAGGCGAAACAGCGATGACCATC  
AACGGCCCGTGGGCATGGTCCAACATCGACACCAGCAAAGTGAATTATGGTGTAAACGGTACTGCCGAC  
CTTCAAGGGTCAACCATCAAACCGTTCGTTGGCGTGCTGAGCGCAGGTATTAACGCCGCCAGTCCGA  
ACAAAGAGCTGGCAAAAGAGTTCTCGAAAACCTATCTGCTGACTGATGAAGGTCTGGAAGCGGTTAAT  
AAAGACAAACCGCTGGGTGCCGTAGCGCTGAAGTCTTACGAGGAAGAGTTGGCGAAAGATCCACGTAT  
TGCCGCCACTATGGAAAACGCCAGAAAGGTGAAATCATGCCGAACATCCCGCAGATGTCCGCTTTCT  
GGTATGCCGTGCGTACTGCGGTGATCAACGCCGCCAGCGGTGCTCAGACTGTCGATGAAGCCCTGAAA  
GACGCGCAGACTAATTCGAGCTCGTAAGTCGACCCTG

4oq1<sup>T</sup>(HQL):

CCTGGGATCCCATCAGCTGGTGACCATTACCGTGGTGAACCAGAAATTACCGCGTGGCAACGGTAGTG  
GTGAAAGTGGTAAAAATCGAAGAAGGTAAACTGGTAATCTGGATTAACGGCGATAAAGGCTATAACGGT  
CTCGCTGAAGTCGGTAAGAAATTCGAGAAAGATACCGGAATTAAGTACCGTTGAGCATCCGGATAA  
ACTGGAAGAGAAATCCCACAGGTTGCGGCAACTGGCGATGGCCCTGACATTATCTTCTGGGCACACG  
ACCGCTTTGGTGGCTACGCTCAATCTGGCCTGTTGGCTGAAATCACCCCGGACAAAGCGTTCAGGAC  
AAGCTGTATCCGTTTACCTGGGATGCCGTACGTTACAACGGCAAGCTGATTGCTTACCCGATCGCTGT  
TGAAGCGTTATCGCTGATTTATAACAAAGATCTGCTGCCGAACCCGCCAAAAACCTGGGAAGAGATCC  
CGGCGCTGGATAAAGAAGTAAAGCGAAAGGTAAGAGCGCGCTGATGTTCAACCTGCAAGAACCGTAC  
TTCACCTGGCCGCTGATTGCTGCTGACGGGGTTATGCGTTCAAGTATGAAAACGGCAAGTACGACAT  
TAAAGACGTGGGCGTGGATAACGCTGGCGCGAAAGCGGGTCTGACCTTCCTGGTTGACCTGATTA  
ACAAACACATGAATGCAGACACCGATTACTCCATCGCAGAAGCTGCCTTTAATAAAGGCGAAACAGCG  
ATGACCATCAACGGCCCGTGGGCATGGTCCAACATCGACACCAGCAAAGTGAATTATGGTGTAAACGGT  
ACTGCCGACCTTCAAGGGTCAACCATCCAAACCGTTCGTTGGCGTCTGAGCGCAGGTATTAACGCCG  
CCAGTCCGAACAAAGAGCTGGCAAAAGAGTTCCTCGAAAACCTATCTGCTGACTGATGAAGGTCTGGAA  
GCGGTTAATAAAGACAAACCGCTGGGTGCCGTAGCGCTGAAGTCTTACGAGGAAGAGTTGGCGAAAGA  
TCCACGTATTGCCGCCACTATGGAAAACGCCAGAAAGGTGAAATCATGCCGAACATCCCGCAGATGT  
CCGCTTCTGGTATGCCGTGCGTACTGCGGTGATCAACGCCCGCCAGCGGTCTCAGACTGTTCGATGAA  
GCCCTGAAAGACGCGCAGACTAATTCGAGCTCGTAAGTCGACCCTG

4oq1<sup>T</sup>(L):

CCTGGGATCCCTGGTGAACCATTACCGTGGTGAACCAGAAATTACCGCGTGGCAACGGTAGTGGTGAAA  
GTGGTAAAATCGAAGAAGGTAAACTGGTAATCTGGATTAACGGCGATAAAGGCTATAACGGTCTCGCT  
GAAGTCGGTAAGAAAATTCGAGAAAGATACCGGAATTAAGTACCGTTGAGCATCCGGATAAACTGGA  
AGAGAAATCCCACAGGTTGCGGCAACTGGCGATGGCCCTGACATTATCTTCTGGGCACACGACCGCT  
TTGGTGGCTACGCTCAATCTGGCCTGTTGGCTGAAATCACCCCGGACAAAGCGTTCAGGACAAGCTG  
TATCCGTTTACCTGGGATGCCGTACGTTACAACGGCAAGCTGATTGCTTACCCGATCGCTGTTGAAGC  
GTTATCGCTGATTTATAACAAAGATCTGCTGCCGAACCCGCCAAAAACCTGGGAAGAGATCCCGGCGC  
TGGATAAAGAAGTAAAGCGAAAGGTAAGAGCGCGCTGATGTTCAACCTGCAAGAACCGTACTTACC  
TGGCCGCTGATTGCTGCTGACGGGGTTATGCGTTCAAGTATGAAAACGGCAAGTACGACATTAAGA  
CGTGGGCGTGGATAACGCTGGCGCGAAAGCGGGTCTGACCTTCCTGGTTGACCTGATTA  
ACAAACACATGAATGCAGACACCGATTACTCCATCGCAGAAGCTGCCTTTAATAAAGGCGAAACAGCGATGACC  
ATCAACGGCCCGTGGGCATGGTCCAACATCGACACCAGCAAAGTGAATTATGGTGTAAACGGTACTGCC  
GACCTTCAAGGGTCAACCATCCAAACCGTTCGTTGGCGTCTGAGCGCAGGTATTAACGCCGCCAGTC  
CGAACAAAGAGCTGGCAAAAGAGTTCCTCGAAAACCTATCTGCTGACTGATGAAGGTCTGGAAGCGGTT  
AATAAAGACAAACCGCTGGGTGCCGTAGCGCTGAAGTCTTACGAGGAAGAGTTGGCGAAAGATCCACG  
TATTGCCGCCACTATGGAAAACGCCAGAAAGGTGAAATCATGCCGAACATCCCGCAGATGTCCGCTT  
TCTGGTATGCCGTGCGTACTGCGGTGATCAACGCCCGCCAGCGGTCTCAGACTGTTCGATGAAGCCCTG  
AAAGACGCGCAGACTAATTCGAGCTCGTAAGTCGACCCTG

4oq1<sup>T</sup>(ΔRGN):

CCTGGGATCCGTGACCATTACCGTGGTGAACCAGAAATTACCGGGTAGTGGTGAAGTGGTAAAATCG  
AAGAAGGTAAACTGGTAATCTGGATTAACGGCGATAAAGGCTATAACGGTCTCGCTGAAGTCGGTAAG  
AAATTCGAGAAAGATACCGGAATTAAGTACCGTTGAGCATCCGGATAAACTGGAAGAGAAATTC  
ACAGGTTGCGGCAACTGGCGATGGCCCTGACATTATCTTCTGGGCACACGACCGCTTTGGTGGCTACG  
CTCAATCTGGCCTGTTGGCTGAAATCACCCCGGACAAAGCGTTCAGGACAAGCTGTATCCGTTTACC  
TGGGATGCCGTACGTTACAACGGCAAGCTGATTGCTTACCCGATCGCTGTTGAAGCGTTATCGCTGAT  
TTATAACAAAGATCTGCTGCCGAACCCGCCAAAAACCTGGGAAGAGATCCCGGCGCTGGATAAAGAAC  
TGAAAGCGAAAGGTAAGAGCGCGCTGATGTTCAACCTGCAAGAACCGTACTTCACCTGGCCGCTGATT  
GCTGCTGACGGGGTTATGCGTTCAAGTATGAAAACGGCAAGTACGACATTAAAGACGTGGGCGTGGA  
TAACGCTGGCGCGAAAGCGGGTCTGACCTTCCTGGTTGACCTGATTAACAAACACATGAATGCAG  
ACACCGATTACTCCATCGCAGAAGCTGCCTTTAATAAAGGCGAAACAGCGATGACCATCAACGGCCCCG  
TGGGCATGGTCCAACATCGACACCAGCAAAGTGAATTATGGTGTAAACGGTACTGCCGACCTTCAAGGG  
TCAACCATCCAAACCGTTCGTTGGCGTGCTGAGCGCAGGTATTAACGCCGCCAGTCCGAACAAAGAGC  
TGGCAAAAGAGTTCCTCGAAAACCTATCTGCTGACTGATGAAGGTCTGGAAGCGGTTAATAAAGACAAA  
CCGCTGGGTGCCGTAGCGCTGAAGTCTTACGAGGAAGAGTTGGCGAAAGATCCACGTATTGCCGCCAC  
TATGAAAACGCCAGAAAGGTGAAATCATGCCGAACATCCCGCAGATGTCCGCTTTCTGGTATGCCG  
TGCGTACTGCGGTGATCAACGCCGCCAGCGGTCTCAGACTGTCGATGAAGCCCTGAAAGACGCGCAG  
ACTAATTCGAGCTCGTAAGTCGACCCTG

3kptC<sup>T</sup>-MBP variants:

3kptC<sup>T</sup> (GSGESG linker and MBP from pMAL-c2 vector):

CCTGGGATCCACCGTGAATTAACCATTGAAAACAACAAAAGCCCGACCAAAGGTAGTGGTGAAGTG  
GTAAAATCGAAGAAGGTAAACTGGTAATCTGGATTAACGGCGATAAAGGCTATAACGGTCTCGCTGAA  
GTCGGTAAGAAATTCGAGAAAGATACCGGAATTAAGTACCGTTGAGCATCCGGATAAACTGGAAGA  
GAAATTCACAGGTTGCGGCAACTGGCGATGGCCCTGACATTATCTTCTGGGCACACGACCGCTTTG  
GTGGCTACGCTCAATCTGGCCTGTTGGCTGAAATCACCCCGGACAAAGCGTTCAGGACAAGCTGTAT  
CCGTTTACCTGGGATGCCGTACGTTACAACGGCAAGCTGATTGCTTACCCGATCGCTGTTGAAGCGTT  
ATCGCTGATTTATAACAAAGATCTGCTGCCGAACCCGCCAAAAACCTGGGAAGAGATCCCGGCGCTGG  
ATAAAGAAGTGAAGCGAAAGGTAAGAGCGCGCTGATGTTCAACCTGCAAGAACCGTACTTCACCTGG  
CCGCTGATTGCTGCTGACGGGGTTATGCGTTCAAGTATGAAAACGGCAAGTACGACATTAAAGACGT  
GGGCGTGGATAACGCTGGCGCGAAAGCGGGTCTGACCTTCCTGGTTGACCTGATTAACAAACACA  
TGAATGCAGACACCGATTACTCCATCGCAGAAGCTGCCTTTAATAAAGGCGAAACAGCGATGACCATC  
AACGGCCCCTGGGCATGGTCCAACATCGACACCAGCAAAGTGAATTATGGTGTAAACGGTACTGCCGAC  
CTTCAAGGGTCAACCATCCAAACCGTTCGTTGGCGTGCTGAGCGCAGGTATTAACGCCGCCAGTCCGA  
ACAAAGAGCTGGCAAAAGAGTTCCTCGAAAACCTATCTGCTGACTGATGAAGGTCTGGAAGCGGTTAAT  
AAAGACAAACCGCTGGGTGCCGTAGCGCTGAAGTCTTACGAGGAAGAGTTGGCGAAAGATCCACGTAT  
TGCCGCCACTATGAAAACGCCAGAAAGGTGAAATCATGCCGAACATCCCGCAGATGTCCGCTTTCT  
GGTATGCCGTGCGTACTGCGGTGATCAACGCCGCCAGCGGTCTCAGACTGTCGATGAAGCCCTGAAA  
GACGCGCAGACTAATTCGAGCTCGTAAGTCGACCCTG

3kpt<sup>T</sup>(NQ):

CCTGGGATCCAACCAGACCGTGAAATTAACCATTGAAAACAACAAAAGCCCCGACCAAAGGTAGTGGTG  
AAAGTGGTAAAATCGAAGAAGGTAAACTGGTAATCTGGATTAACGGCGATAAAGGCTATAACGGTCTC  
GCTGAAGTCGGTAAGAAATTCGAGAAAGATACCGGAATTAAGTCACCGTTGAGCATCCGGATAAACT  
GGAAGAGAAATTCCCACAGGTTGCGGCAACTGGCGATGGCCCTGACATTATCTTCTGGGCACACGACC  
GCTTTGGTGGCTACGCTCAATCTGGCCTGTTGGCTGAAATCACCCCGACAAAGCGTTCAGGACAAG  
CTGTATCCGTTTACCTGGGATGCCGTACGTTACAACGGCAAGCTGATTGCTTACCCGATCGCTGTTGA  
AGCGTTATCGCTGATTTATAACAAAGATCTGCTGCCGAACCCGCCAAAAACCTGGGAAGAGATCCCGG  
CGCTGGATAAAGAACTGAAAGCGAAAGGTAAGAGCGCGCTGATGTTCAACCTGCAAGAACCGTACTTC  
ACCTGGCCGCTGATTGCTGCTGACGGGGGTTATGCGTTCAAGTATGAAAACGGCAAGTACGACATTA  
AGACGTGGGCGTGGATAACGCTGGCGCGAAAGCGGGTCTGACCTTCCTGGTTGACCTGATTA AAAACA  
AACACATGAATGCAGACACCGATTACTCCATCGCAGAAGCTGCCTTTAATAAAGGCGAAACAGCGATG  
ACCATCAACGGCCCGTGGGCATGGTCCAACATCGACACCAGCAAAGTGAATTATGGTGTAAACGGTACT  
GCCGACCTTCAAGGGTCAACCATCCAACCGTTTCGTTGGCGTGCTGAGCGCAGGTATTAACGCCGCCA  
GTCCGAACAAAGAGCTGGCAAAAGAGTTCCCTCGAAAACCTATCTGCTGACTGATGAAGGTCTGGAAGCG  
GTTAATAAAGACAAACCGCTGGGTGCCGTAGCGCTGAAGTCTTACGAGGAAGAGTTGGCGAAAGATCC  
ACGTATTGCCGCCACTATGGAAAACGCCAGAAAGGTGAAATCATGCCGAACATCCCGCAGATGTCCG  
CTTTCTGGTATGCCGTGCGTACTGCGGTGATCAACGCCGCCAGCGGTTCGTCAGACTGTCGATGAAGCC  
CTGAAAGACGCGCAGACTAATTCGAGCTCGTAAGTCGACCCTG

3kpt<sup>T</sup>(GWI):

CCTGGGATCCACCGTGAAATTAACCATTGAAAACAACAAAAGCGGCTGGATTGGTAGTGGTAAAAGTG  
GTAAAATCGAAGAAGGTAAACTGGTAATCTGGATTAACGGCGATAAAGGCTATAACGGTCTCGCTGAA  
GTCGGTAAGAAATTCGAGAAAGATACCGGAATTAAGTCACCGTTGAGCATCCGGATAAACTGGAAGA  
GAAATCCCACAGGTTGCGGCAACTGGCGATGGCCCTGACATTATCTTCTGGGCACACGACCGCTTTG  
GTGGCTACGCTCAATCTGGCCTGTTGGCTGAAATCACCCCGACAAAGCGTTCAGGACAAGCTGTAT  
CCGTTTACCTGGGATGCCGTACGTTACAACGGCAAGCTGATTGCTTACCCGATCGCTGTTGAAGCGTT  
ATCGCTGATTTATAACAAAGATCTGCTGCCGAACCCGCCAAAAACCTGGGAAGAGATCCCGGCGCTGG  
ATAAAGAAGTAAAAGCGAAAGGTAAGAGCGCGCTGATGTTCAACCTGCAAGAACCGTACTTCACCTGG  
CCGCTGATTGCTGCTGACGGGGGTTATGCGTTCAAGTATGAAAACGGCAAGTACGACATTAAGACGT  
GGGCGTGGATAACGCTGGCGCGAAAGCGGGTCTGACCTTCCTGGTTGACCTGATTA AAAACA  
TGAATGCAGACACCGATTACTCCATCGCAGAAGCTGCCTTTAATAAAGGCGAAACAGCGATGACCATC  
AACGGCCCGTGGGCATGGTCCAACATCGACACCAGCAAAGTGAATTATGGTGTAAACGGTACTGCCGAC  
CTTCAAGGGTCAACCATCCAACCGTTTCGTTGGCGTGCTGAGCGCAGGTATTAACGCCGCCAGTCCGA  
ACAAAGAGCTGGCAAAAGAGTTCCCTCGAAAACCTATCTGCTGACTGATGAAGGTCTGGAAGCGGTTAAT  
AAAGACAAACCGCTGGGTGCCGTAGCGCTGAAGTCTTACGAGGAAGAGTTGGCGAAAGATCCACGTAT  
TGCCGCCACTATGGAAAACGCCAGAAAGGTGAAATCATGCCGAACATCCCGCAGATGTCCGCTTTCT  
GGTATGCCGTGCGTACTGCGGTGATCAACGCCGCCAGCGGTTCGTCAGACTGTCGATGAAGCCCTGAAA  
GACGCGCAGACTAATTCGAGCTCGTAAGTCGACCCTG



4oq1 non-reactive variants:

4oq1<sup>T</sup>(N252A)-MBP:

CCTGGGATCCGTGACCATTACCGTGGTGGCGCAGAAATTACCGCGTGGCAACGGTAGTGGTGAAAGTG  
GTAAAATCGAAGAAGGTAAACTGGTAATCTGGATTAACGGCGATAAAGGCTATAACGGTCTCGCTGAA  
GTCGGTAAGAAATTCGAGAAAGATACCGGAATTAAAGTCACCGTTGAGCATCCGGATAAACTGGAAGA  
GAAATTCACACAGGTTGCGGCAACTGGCGATGGCCCTGACATTATCTTCTGGGCACACGACCGCTTTG  
GTGGCTACGCTCAATCTGGCCTGTTGGCTGAAATCACCCCGGACAAAGCGTTCAGGACAAGCTGTAT  
CCGTTTACCTGGGATGCCGTACGTTACAACGGCAAGCTGATTGCTTACCCGATCGCTGTTGAAGCGTT  
ATCGCTGATTTATAACAAAGATCTGCTGCCGAACCCGCCAAAAACCTGGGAAGAGATCCCGGCGCTGG  
ATAAAGAAGTCAAAGCGAAAGGTAAGAGCGCGCTGATGTTCAACCTGCAAGAACCGTACTTCACCTGG  
CCGCTGATTGCTGCTGACGGGGTTATGCGTTCAAGTATGAAAACGGCAAGTACGACATTAAAGACGT  
GGGCGTGGATAACGCTGGCGCGAAAGCGGGTCTGACCTTCCTGGTTGACCTGATTA AAAACAACACA  
TGAATGCAGACACCGATTACTCCATCGCAGAAGCTGCCTTTAATAAAGGCGAAACAGCGATGACCATC  
AACGGCCCGTGGGCATGGTCCAACATCGACACCAGCAAAGTGAATTATGGTGTAACGGTACTGCCGAC  
CTTCAAGGGTCAACCATCCAAACCGTTCGTTGGCGTGTGAGCGCAGGTATTAACGCCGCCAGTCCGA  
ACAAAGAGCTGGCAAAAGAGTTCTCGAAAATATCTGCTGACTGATGAAGGTCTGGAAGCGGTTAAT  
AAAGACAAACCGCTGGGTGCCGTAGCGCTGAAGTCTTACGAGGAAGAGTTGGCGAAAGATCCACGTAT  
TGCCGCCACTATGGA AACGCCAGAAAGGTGAAATCATGCCGAACATCCCGCAGATGTCCGCTTTCT  
GGTATGCCGTGCGTACTGCGGTGATCAACGCCCGCCAGCGGTCTGTCAGACTGTCGATGAAGCCCTGAAA  
GACGCGCAGACTAATTCGAGCTCGTAAGTCGACCCTG

4oq1<sup>C</sup>(K155A):

CCTGGGATCCACCATGACCACCAAAGTGAAACTGATTGCGGTGGATCAGGATCATAACCGTTTAGAAG  
GCGTGGGCTTTAAATTAGTGTCTGTGGCGCGTGATGTGTCTGAAAAAGAAGTGCCGTTAATTGGCGAA  
TATCGTTATAGCTCTTCTGGCCAGGTGGGCCGTACCCTGTATACCGATAAAAACGGCGAAATTTTTGT  
GACCAACCTGCCGCTGGGCAACTATCGTTTTAAAGAAGTGAACCGCTGGCGGGCTATGCGGTGACCA  
CCCTGGATACCGATGTGCAGCTGTAAGTCGACCCTG

4oq1<sup>C</sup>(E222Q):

CCTGGGATCCACCATGACCACCAAAGTGAAACTGATTAAAGTGGATCAGGATCATAACCGTTTAGAAG  
GCGTGGGCTTTAAATTAGTGTCTGTGGCGCGTGATGTGTCTGAAAAAGAAGTGCCGTTAATTGGCGAA  
TATCGTTATAGCTCTTCTGGCCAGGTGGGCCGTACCCTGTATACCGATAAAAACGGCGAAATTTTTGT  
GACCAACCTGCCGCTGGGCAACTATCGTTTTAAACAGGTGGAACCGCTGGCGGGCTATGCGGTGACCA  
CCCTGGATACCGATGTGCAGCTGTAAGTCGACCCTG

3kptC non-reactive variants:

3kptC<sup>T</sup>(N512A)-MBP:

CCTGGGATCCACCGTGAAATTAACCATTGAAGCGAACAAAAGCCCGACCAAAGGTAGTGGTGAAAGTG  
GTAAAATCGAAGAAGGTAAACTGGTAATCTGGATTAACGGCGATAAAGGCTATAACGGTCTCGCTGAA  
GTCGGTAAGAAATTCGAGAAAGATACCGGAATTAAAGTCACCGTTGAGCATCCGGATAAACTGGAAGA  
GAAATTCACAGGTTGCGGCAACTGGCGATGGCCCTGACATTATCTTCTGGGCACACGACCGCTTTG  
GTGGCTACGCTCAATCTGGCCTGTTGGCTGAAATCACCCCGGACAAAGCGTTCAGGACAAGCTGTAT  
CCGTTTACCTGGGATGCCGTACGTTACAACGGCAAGCTGATTGCTTACCCGATCGCTGTTGAAGCGTT  
ATCGCTGATTTATAACAAAGATCTGCTGCCGAACCCGCCAAAAACCTGGGAAGAGATCCCGGCGCTGG  
ATAAAGAAGCTGAAAGCGAAAGGTAAGAGCGCGCTGATGTTCAACCTGCAAGAACCGTACTTCACCTGG  
CCGCTGATTGCTGCTGACGGGGTTATGCGTTCAAGTATGAAAACGGCAAGTACGACATTAAAGACGT  
GGGCGTGGATAACGCTGGCGCGAAAGCGGGTCTGACCTTCCTGGTTGACCTGATTA AAAACAACACA  
TGAATGCAGACACCGATTACTCCATCGCAGAAGCTGCCTTTAATAAAGGCGAAACAGCGATGACCATC  
AACGGCCCGTGGGCATGGTCCAACATCGACACCAGCAAAGTGAATTATGGTGTAACGGTACTGCCGAC  
CTTCAAGGGTCAACCATCCAAACCGTTCGTTGGCGTGCTGAGCGCAGGTATTAACGCCGCCAGTCCGA  
ACAAAGAGCTGGCAAAAGAGTTCTCGAAAACCTATCTGCTGACTGATGAAGGTCTGGAAGCGGTTAAT  
AAAGACAAACCGCTGGGTGCCGTAGCGCTGAAGTCTTACGAGGAAGAGTTGGCGAAAGATCCACGTAT  
TGCCGCCACTATGAAAACGCCAGAAAGGTGAAATCATGCCGAACATCCCGCAGATGTCCGCTTTCT  
GGTATGCCGTGCGTACTGCGGTGATCAACGCCGCCAGCGGTGCTCAGACTGTCGATGAAGCCCTGAAA  
GACGCGCAGACTAATTCGAGCTCGTAAGTCGACCCTG

3kptC<sup>C</sup>(K417A):

CCTGGGATCCACCACCGGCATTATTGAATTAACCGCGATTGATAGCGCGAACAAAAACAAATTA AAAG  
GCGCGGAATTTGTGCTGAAAGATAACAACGGCAAATTTGTGGTGGTGGCGGGCAAAGAAGTGACCGGC  
GTGTCTGATGAAAACGGCGTGATTAAATGGTCTAACATTCCGTATGGCGATTATCAGATTTTTGAAAC  
CAAAGCGCCGACCTATACCAAAGAAGATGGCACCAAACCTCTTATCAGTTATTA AAAGATCCGATTG  
ATGTGAAAATTAGCTAAGTCGACCCTG

3kptC<sup>C</sup>(E472Q):

CCTGGGATCCACCACCGGCATTATTGAATTAACCAAATTTGATAGCGCGAACAAAAACAAATTA AAAG  
GCGCGGAATTTGTGCTGAAAGATAACAACGGCAAATTTGTGGTGGTGGCGGGCAAAGAAGTGACCGGC  
GTGTCTGATGAAAACGGCGTGATTAAATGGTCTAACATTCCGTATGGCGATTATCAGATTTTTGAGAC  
CAAAGCGCCGACCTATACCAAAGAAGATGGCACCAAACCTCTTATCAGTTATTA AAAGATCCGATTG  
ATGTGAAAATTAGCTAAGTCGACCCTG
