# Supplementary material for: Probing the potential of CnaB-type domains for the design of tag/catcher systems
Source: PLoS One. 2017 Jun 27;12(6):e0179740. doi: 10.1371/journal.pone.0179740 (PMC5487036; doi:10.1371/journal.pone.0179740)
Supplement: S8 Table — (XLSX) [file pone.0179740.s018.xlsx]

## Sheet: Sheet1
Accession	Description	Score	Coverage	# Proteins	# Unique Peptides	# Peptides	# PSMs	Area	# AAs	MW [kDa]	calc. pI
3kptCTag-MBP	3kptCTag-MBP	821.804	93.53	1	49	49	312	8.31643e+09	402	43.9844	6.02393
	Confidence Level	Sequence	PSM Ambiguity	# Proteins	# Protein Groups	Protein Group Accessions	Modifications	Activation Type	ΔScore	ΔCn	Rank	Search Engine Rank	QuanResultID	Precursor Area	q-Value	PEP	XCorr	# Missed Cleavages	Isolation Interference [%]	Ion Inject Time [ms]	Charge	m/z [Da]	MH+ [Da]	ΔM [ppm]	RT [min]	First Scan	Last Scan	MS Order	Ions Matched	Spectrum File
	High	SALmFNLQEPYFTWPLIAADGGYAFK	Unambiguous	1	1	3kptCTag-MBP	M4(Oxidation)	CID	1	0	1	1			0	3.12e-11	6.64469	0	0.713203	43	3	989.487	2966.45	0.822421	38.8672	13703	13703	MS2	0/0	3kptc_product_trypsin-2ul_2.raw
	High	HMNADTDYSIAEAAFNKGETAMTINGPWAWSNIDTSK	Unambiguous	1	1	3kptCTag-MBP		CID	1	0	1	1		9.22114e+06	0	4.188e-08	6.50083	1	59.0817	41	4	1015.21	4057.8	-8.45789	31.6567	9712	9712	MS2	0/0	3kptc_product_trypsin-2ul_2.raw
	High	EFLENYLLTDEGLEAVNK	Unambiguous	1	1	3kptCTag-MBP		CID	1	0	1	1		2.47439e+07	0	5.928e-09	6.47425	0	21.078	42	2	1049.02	2097.03	-2.84633	35.8033	12105	12105	MS2	0/0	3kptc_product_trypsin-2ul_2.raw
	High	GSGESGKIEEGKLVIWINGDK	Unambiguous	1	1	3kptCTag-MBP		CID	1	0	1	1		7.96727e+07	0	3.115e-10	6.2959	2	0	12	3	739.39	2216.16	0.0806404	26.0553	6298	6298	MS2	0/0	3kptc_product_trypsin-2ul_2.raw
	High	ELAKEFLENYLLTDEGLEAVNKDKPLGAVALK	Unambiguous	1	1	3kptCTag-MBP		CID	1	0	1	1		1.44369e+07	0	3.235e-11	6.26041	2	25.7391	40	4	883.479	3530.89	-1.27535	33.5692	10804	10804	MS2	0/0	3kptc_product_trypsin-2ul_2.raw
	High	IAATMENAQKGEIMPNIPQMSAFWYAVR	Unambiguous	1	1	3kptCTag-MBP		CID	1	0	1	1		16460589	0	1.205e-09	6.14238	1	32.4155	43	4	792.643	3167.55	0.182216	33.2596	10629	10629	MS2	0/0	3kptc_product_trypsin-2ul_2.raw
	High	NKHmNADTDYSIAEAAFNK	Unambiguous	1	1	3kptCTag-MBP	M4(Oxidation)	CID	1	0	1	1		4.6103e+07	0	1.137e-07	5.91436	1	10.5665	43	3	719.329	2155.97	-0.0508848	23.4824	4729	4729	MS2	0/0	3kptc_product_trypsin-2ul_2.raw
	High	VTVEHPDKLEEKFPQVAATGDGPDIIFWAHDR	Unambiguous	1	1	3kptCTag-MBP		CID	1	0	1	1			0	6.13529e-13	5.68214	2	20.5408	42	4	905.207	3617.81	0.711237	29.5111	8299	8299	MS2	0/0	3kptc_product_trypsin-2ul_2.raw
	High	IAATMENAQKGEImPNIPQmSAFWYAVR	Unambiguous	1	1	3kptCTag-MBP	M14(Oxidation); M20(Oxidation)	CID	1	0	1	1		9.70784e+06	0	4.661e-08	5.68169	1	29.9036	42	4	800.639	3199.53	-0.990405	29.3128	8175	8175	MS2	0/0	3kptc_product_trypsin-2ul_2.raw
	High	ELAKEFLENYLLTDEGLEAVNKDKPLGAVALK	Unambiguous	1	1	3kptCTag-MBP		CID	1	0	1	1		1.66473e+08	0	2.031e-08	5.67128	2	7.56463	4	4	883.482	3530.91	2.45842	32.4289	10180	10180	MS2	0/0	3kptc_product_trypsin-2ul_2.raw
	High	HMNADTDYSIAEAAFNKGETAMTINGPWAWSNIDTSK	Unambiguous	1	1	3kptCTag-MBP		CID	1	0	1	1		2.45599e+06	0	9.076e-08	5.61457	1	6.55576	43	4	1015.21	4057.83	0.0254888	36.1144	12221	12221	MS2	0/0	3kptc_product_trypsin-2ul_2.raw
	High	HMNADTDYSIAEAAFNKGETAmTINGPWAWSNIDTSK	Unambiguous	1	1	3kptCTag-MBP	M22(Oxidation)	CID	1	0	1	1		502490440	0	0.0002166	5.55992	1	22.3193	9	4	1019.21	4073.82	-1.0037	32.6616	10325	10325	MS2	0/0	3kptc_product_trypsin-2ul_2.raw
	High	HMNADTDYSIAEAAFNKGETAMTINGPWAWSNIDTSK	Unambiguous	1	1	3kptCTag-MBP		CID	1	0	1	1			0	1.433e-07	5.50071	1	0.778179	41	4	1015.22	4057.84	2.01094	34.0756	11087	11087	MS2	0/0	3kptc_product_trypsin-2ul_2.raw
	High	SALmFNLQEPYFTWPLIAADGGYAFK	Unambiguous	1	1	3kptCTag-MBP	M4(Oxidation)	CID	1	0	1	1		470489	0	2.311e-07	5.44051	0	8.3941	49	4	742.366	2966.44	-0.972154	38.5764	13570	13570	MS2	0/0	3kptc_product_trypsin-2ul_2.raw
	High	EFLENYLLTDEGLEAVNK	Unambiguous	1	1	3kptCTag-MBP		CID	1	0	1	1		2.11218e+06	0	3.032e-09	5.42622	0	3.72258	42	3	699.685	2097.04	1.16381	34.139	11126	11126	MS2	0/0	3kptc_product_trypsin-2ul_2.raw
	High	LVIWINGDKGYNGLAEVGK	Unambiguous	1	1	3kptCTag-MBP		CID	1	0	1	1		32204666	0	5.443e-09	5.3464	1	4.86843	38	2	1023.55	2046.1	0.131543	29.113	8080	8080	MS2	0/0	3kptc_product_trypsin-2ul_2.raw
	High	FGGYAQSGLLAEITPDKAFQDKLYPFTWDAVR	Unambiguous	1	1	3kptCTag-MBP		CID	1	0	1	1		45613352	0	2.096e-08	5.30921	2	0	42	4	901.956	3604.8	-2.05215	35.8398	12118	12118	MS2	0/0	3kptc_product_trypsin-2ul_2.raw
	High	EFLENYLLTDEGLEAVNK	Unambiguous	1	1	3kptCTag-MBP		CID	1	0	1	1		2.41708e+07	0	7.908e-06	5.29298	0	15.7703	0	2	1049.02	2097.04	-1.56569	32.6512	10316	10316	MS2	0/0	3kptc_product_trypsin-2ul_2.raw
	High	VTVEHPDKLEEKFPQVAATGDGPDIIFWAHDR	Unambiguous	1	1	3kptCTag-MBP		CID	1	0	1	1		1.65694e+07	0	1.187e-11	5.26044	2	34.7102	42	4	905.208	3617.81	1.85845	30.5748	8964	8964	MS2	0/0	3kptc_product_trypsin-2ul_2.raw
	High	NKHmNADTDYSIAEAAFNKGETAMTINGPWAWSNIDTSK	Unambiguous	1	1	3kptCTag-MBP	M4(Oxidation)	CID	1	0	1	1			0	8.755e-07	5.23956	2	0.331891	39	5	863.999	4315.97	0.260679	32.0152	9927	9927	MS2	0/0	3kptc_product_trypsin-2ul_2.raw
	High	ELAKEFLENYLLTDEGLEAVNK	Unambiguous	1	1	3kptCTag-MBP		CID	1	0	1	1		2.23313e+06	0	9.918e-08	5.15535	1	3.57086	41	3	846.772	2538.3	1.23744	35.4506	11929	11929	MS2	0/0	3kptc_product_trypsin-2ul_2.raw
	High	IAATMENAQKGEImPNIPQmSAFWYAVR	Unambiguous	1	1	3kptCTag-MBP	M14(Oxidation); M20(Oxidation)	CID	1	0	1	1		1.23451e+08	0	3.952e-07	5.09301	1	0	43	3	1067.18	3199.54	0.635278	29.2881	8156	8156	MS2	0/0	3kptc_product_trypsin-2ul_2.raw
	High	NKHMNADTDYSIAEAAFNKGETAmTINGPWAWSNIDTSK	Unambiguous	1	1	3kptCTag-MBP	M24(Oxidation)	CID	1	0	1	1		7.62704e+06	0	1.269e-05	5.04029	2	28.2816	40	4	1079.75	4315.96	-0.711984	29.6324	8387	8387	MS2	0/0	3kptc_product_trypsin-2ul_2.raw
	High	EFLENYLLTDEGLEAVNK	Unambiguous	1	1	3kptCTag-MBP		CID	1	0	1	1			0	2.287e-06	5.01403	0	9.42565	31	2	1049.02	2097.04	-0.285051	36.8264	12621	12621	MS2	0/0	3kptc_product_trypsin-2ul_2.raw
	High	GEIMPNIPQMSAFWYAVR	Unambiguous	1	1	3kptCTag-MBP		CID	1	0	1	1		1.53363e+08	0	4.228e-07	4.95993	0	0.0670352	4	2	1055.52	2110.03	0.915518	36.4521	12384	12384	MS2	0/0	3kptc_product_trypsin-2ul_2.raw
	High	IAATMENAQKGEImPNIPQmSAFWYAVR	Unambiguous	1	1	3kptCTag-MBP	M14(Oxidation); M20(Oxidation)	CID	1	0	1	1		231535744	0	2.463e-05	4.92602	1	19.1443	43	3	1067.18	3199.54	-0.509296	30.2907	8806	8806	MS2	0/0	3kptc_product_trypsin-2ul_2.raw
	High	IAATmENAQKGEImPNIPQMSAFWYAVR	Unambiguous	1	1	3kptCTag-MBP	M5(Oxidation); M14(Oxidation)	CID	1	0	1	1		299019741	0	2.226e-08	4.9092	1	2.15195	32	3	1067.18	3199.54	-0.165923	31.3393	9490	9490	MS2	0/0	3kptc_product_trypsin-2ul_2.raw
	High	GETAmTINGPWAWSNIDTSK	Unambiguous	1	1	3kptCTag-MBP	M5(Oxidation)	CID	1	0	1	1		6.13169e+07	0	1.83e-08	4.89741	0	28.9702	41	3	732.341	2195.01	0.78502	29.9531	8610	8610	MS2	0/0	3kptc_product_trypsin-2ul_2.raw
	High	VTVEHPDKLEEKFPQVAATGDGPDIIFWAHDR	Unambiguous	1	1	3kptCTag-MBP		CID	1	0	1	1		1.65694e+07	0	3.289e-06	4.8824	2	0	42	4	905.204	3617.8	-1.85312	30.5424	8945	8945	MS2	0/0	3kptc_product_trypsin-2ul_2.raw
	High	GSGESGKIEEGKLVIWINGDK	Unambiguous	1	1	3kptCTag-MBP		CID	1	0	1	1		1.56852e+07	0	1.176e-06	4.84219	2	1.0214	6	2	1108.58	2216.16	0.4172	26.0643	6300	6300	MS2	0/0	3kptc_product_trypsin-2ul_2.raw
	High	VTVEHPDKLEEKFPQVAATGDGPDIIFWAHDR	Unambiguous	1	1	3kptCTag-MBP		CID	1	0	1	1		5.42917e+06	0	4.571e-06	4.82358	2	4.15807	39	4	905.206	3617.8	-0.368493	31.5948	9663	9663	MS2	0/0	3kptc_product_trypsin-2ul_2.raw
	High	IAATmENAQKGEIMPNIPQMSAFWYAVR	Unambiguous	1	1	3kptCTag-MBP	M5(Oxidation)	CID	1	0	1	1		6.22424e+08	0	3.412e-08	4.73736	1	0	32	3	1061.85	3183.54	-1.34225	32.7707	10370	10370	MS2	0/0	3kptc_product_trypsin-2ul_2.raw
	High	HMNADTDYSIAEAAFNKGETAMTINGPWAWSNIDTSK	Unambiguous	1	1	3kptCTag-MBP		CID	1	0	1	1			0	8.564e-06	4.69834	1	4.39351	42	4	1015.21	4057.83	-1.29815	41.1724	14591	14591	MS2	0/0	3kptc_product_trypsin-2ul_2.raw
	High	EFLENYLLTDEGLEAVNK	Unambiguous	1	1	3kptCTag-MBP		CID	1	0	1	1		1.07411e+06	0	1.062e-07	4.69781	0	6.21061	41	3	699.686	2097.04	2.2116	36.1994	12253	12253	MS2	0/0	3kptc_product_trypsin-2ul_2.raw
	High	FGGYAQSGLLAEITPDKAFQDK	Unambiguous	1	1	3kptCTag-MBP		CID	1	0	1	1		118740313	0	1.075e-09	4.69045	1	2.34634	41	3	786.066	2356.18	0.328135	30.9074	9187	9187	MS2	0/0	3kptc_product_trypsin-2ul_2.raw
	High	FPQVAATGDGPDIIFWAHDR	Unambiguous	1	1	3kptCTag-MBP		CID	1	0	1	1		6.60564e+06	0	7.16e-10	4.672	0	23.083	41	3	738.364	2213.08	-0.02419	33.0484	10514	10514	MS2	0/0	3kptc_product_trypsin-2ul_2.raw
	High	FGGYAQSGLLAEITPDKAFQDKLYPFTWDAVR	Unambiguous	1	1	3kptCTag-MBP		CID	1	0	1	1		4.91946e+08	0	3.112e-08	4.66814	2	0.583695	42	4	901.96	3604.82	2.07916	34.3087	11244	11244	MS2	0/0	3kptc_product_trypsin-2ul_2.raw
	High	AFQDKLYPFTWDAVR	Unambiguous	1	1	3kptCTag-MBP		CID	1	0	1	1			0	2.64e-07	4.66122	1	45.0531	42	3	619.649	1856.93	-0.949272	30.1703	8744	8744	MS2	0/0	3kptc_product_trypsin-2ul_2.raw
	High	FGGYAQSGLLAEITPDK	Unambiguous	1	1	3kptCTag-MBP		CID	1	0	1	1			0	2.414e-06	4.65405	0	28.8333	41	2	883.952	1766.9	0.150848	33.2416	10619	10619	MS2	0/0	3kptc_product_trypsin-2ul_2.raw
	High	AFQDKLYPFTWDAVR	Unambiguous	1	1	3kptCTag-MBP		CID	1	0	1	1			0	5.169e-07	4.65386	1	8.72395	40	3	619.648	1856.93	-1.24509	31.183	9377	9377	MS2	0/0	3kptc_product_trypsin-2ul_2.raw
	High	EFLENYLLTDEGLEAVNK	Unambiguous	1	1	3kptCTag-MBP		CID	1	0	1	1			0	1.667e-07	4.61896	0	2.36409	58	2	1049.02	2097.04	-0.634317	43.1494	15166	15166	MS2	0/0	3kptc_product_trypsin-2ul_2.raw
	High	GKSALMFNLQEPYFTWPLIAADGGYAFK	Unambiguous	1	1	3kptCTag-MBP		CID	1	0	1	1		2.97144e+06	0	1.456e-06	4.61561	1	43.4819	41	3	1045.86	3135.56	-1.26709	36.6351	12481	12481	MS2	0/0	3kptc_product_trypsin-2ul_2.raw
	High	HmNADTDYSIAEAAFNKGETAMTINGPWAWSNIDTSK	Unambiguous	1	1	3kptCTag-MBP	M2(Oxidation)	CID	1	0	1	1		8415969	0	0.0001135	4.60972	1	13.3744	38	4	1019.21	4073.83	0.0750196	33.6873	10863	10863	MS2	0/0	3kptc_product_trypsin-2ul_2.raw
	High	FGGYAQSGLLAEITPDK	Unambiguous	1	1	3kptCTag-MBP		CID	1	0	1	1		1.86611e+06	0	3.581e-06	4.58722	0	14.8779	41	2	883.952	1766.9	0.703547	34.2578	11209	11209	MS2	0/0	3kptc_product_trypsin-2ul_2.raw
	High	HMNADTDYSIAEAAFNKGETAMTINGPWAWSNIDTSK	Unambiguous	1	1	3kptCTag-MBP		CID	1	0	1	1			0	7.907e-06	4.56891	1	1.38798	29	4	1015.21	4057.84	0.506811	37.1288	12813	12813	MS2	0/0	3kptc_product_trypsin-2ul_2.raw
	High	FPQVAATGDGPDIIFWAHDR	Unambiguous	1	1	3kptCTag-MBP		CID	1	0	1	1			0	1.758e-09	4.45033	0	18.2896	43	3	738.364	2213.08	0.554975	34.1399	11127	11127	MS2	0/0	3kptc_product_trypsin-2ul_2.raw
	High	NKHMNADTDYSIAEAAFNK	Unambiguous	1	1	3kptCTag-MBP		CID	1	0	1	1		1.73444e+07	0	1.664e-06	4.42153	1	51.2667	32	3	713.997	2139.98	0.167989	24.1174	5132	5132	MS2	0/0	3kptc_product_trypsin-2ul_2.raw
	High	AFQDKLYPFTWDAVR	Unambiguous	1	1	3kptCTag-MBP		CID	1	0	1	1		1.69512e+06	0	3.691e-06	4.41492	1	11.7959	39	3	619.65	1856.93	0.62843	32.204	10052	10052	MS2	0/0	3kptc_product_trypsin-2ul_2.raw
	High	FGGYAQSGLLAEITPDKAFQDKLYPFTWDAVR	Unambiguous	1	1	3kptCTag-MBP		CID	1	0	1	1		7.60463e+07	0	4.705e-05	4.40647	2	0	42	3	1202.27	3604.81	-0.406049	34.205	11172	11172	MS2	0/0	3kptc_product_trypsin-2ul_2.raw
	High	VNYGVTVLPTFK	Unambiguous	1	1	3kptCTag-MBP		CID	1	0	1	1			0	2.517e-07	4.39859	0	43.5213	42	3	446.587	1337.75	-0.919041	29.0867	8069	8069	MS2	0/0	3kptc_product_trypsin-2ul_2.raw
	High	VTVEHPDKLEEKFPQVAATGDGPDIIFWAHDR	Unambiguous	1	1	3kptCTag-MBP		CID	1	0	1	1		137822471	0	2.613e-06	4.25072	2	8.09362	41	5	724.367	3617.8	0.26888	30.5739	8963	8963	MS2	0/0	3kptc_product_trypsin-2ul_2.raw
	High	HmNADTDYSIAEAAFNK	Unambiguous	1	1	3kptCTag-MBP	M2(Oxidation)	CID	1	0	1	1			0	2.233e-08	4.22923	0	0	41	2	957.42	1913.83	-0.166586	26.1554	6346	6346	MS2	0/0	3kptc_product_trypsin-2ul_2.raw
	High	FGGYAQSGLLAEITPDK	Unambiguous	1	1	3kptCTag-MBP		CID	1	0	1	1		526045440	0	3.351e-07	4.22896	0	76.2201	4	3	589.636	1766.89	-0.754899	30.2071	8761	8761	MS2	0/0	3kptc_product_trypsin-2ul_2.raw
	High	HmNADTDYSIAEAAFNK	Unambiguous	1	1	3kptCTag-MBP	M2(Oxidation)	CID	1	0	1	1		1.23449e+08	0	1.384e-06	4.22221	0	34.5973	27	3	638.616	1913.83	-0.556311	25.0073	5670	5670	MS2	0/0	3kptc_product_trypsin-2ul_2.raw
	High	EFLENYLLTDEGLEAVNK	Unambiguous	1	1	3kptCTag-MBP		CID	1	0	1	1			0	4.372e-06	4.19122	0	0	31	2	1049.02	2097.04	0.180635	38.8451	13693	13693	MS2	0/0	3kptc_product_trypsin-2ul_2.raw
	High	AFQDKLYPFTWDAVR	Unambiguous	1	1	3kptCTag-MBP		CID	1	0	1	1		1.05532e+09	0	1.908e-05	4.18407	1	22.2312	40	2	928.972	1856.94	2.21337	30.2074	8762	8762	MS2	0/0	3kptc_product_trypsin-2ul_2.raw
	High	HmNADTDYSIAEAAFNKGETAmTINGPWAWSNIDTSK	Unambiguous	1	1	3kptCTag-MBP	M2(Oxidation); M22(Oxidation)	CID	1	0	1	1			0	8.705e-06	4.1558	1	72.7397	10	4	1023.21	4089.82	-1.72637	30.832	9146	9146	MS2	0/0	3kptc_product_trypsin-2ul_2.raw
	High	ELAKEFLENYLLTDEGLEAVNK	Unambiguous	1	1	3kptCTag-MBP		CID	1	0	1	1		549379	0	5.616e-07	4.14873	1	0	250	2	1269.65	2538.3	1.02633	32.5304	10233	10233	MS2	0/0	3kptc_product_trypsin-2ul_2.raw
	High	GEIMPNIPQMSAFWYAVR	Unambiguous	1	1	3kptCTag-MBP		CID	1	0	1	1		1.82372e+10	0	2.174e-06	4.14074	0	0.360601	3	2	1055.51	2110.02	-3.01846	35.8653	12124	12124	MS2	0/0	3kptc_product_trypsin-2ul_2.raw
	High	AFQDKLYPFTWDAVR	Unambiguous	1	1	3kptCTag-MBP		CID	1	0	1	1			0	2.775e-05	4.13626	1	0	41	3	619.65	1856.93	0.62843	33.2435	10621	10621	MS2	0/0	3kptc_product_trypsin-2ul_2.raw
	High	LIAYPIAVEALSLIYNK	Unambiguous	1	1	3kptCTag-MBP		CID	1	0	1	1			0	5.799e-08	4.10158	0	14.8389	136	3	631.036	1891.09	-0.168801	38.3343	13428	13428	MS2	0/0	3kptc_product_trypsin-2ul_2.raw
	High	HMNADTDYSIAEAAFNK	Unambiguous	1	1	3kptCTag-MBP		CID	1	0	1	1		5612677	0	1.975e-06	4.08827	0	78.9902	30	3	633.284	1897.84	-0.506734	26.7669	6724	6724	MS2	0/0	3kptc_product_trypsin-2ul_2.raw
	High	GQPSKPFVGVLSAGINAASPNKELAK	Unambiguous	1	1	3kptCTag-MBP		CID	1	0	1	1			0	1.226e-08	4.05597	1	14.4574	43	3	860.81	2580.41	-0.152538	27.9556	7397	7397	MS2	0/0	3kptc_product_trypsin-2ul_2.raw
	High	LVIWINGDKGYNGLAEVGK	Unambiguous	1	1	3kptCTag-MBP		CID	1	0	1	1		14082747	0	2.68e-06	4.02815	1	52.5063	41	3	682.704	2046.1	-1.51568	29.2021	8116	8116	MS2	0/0	3kptc_product_trypsin-2ul_2.raw
	High	TWEEIPALDKELK	Unambiguous	1	1	3kptCTag-MBP		CID	1	0	1	1		4.68836e+06	0	5.684e-05	4.02624	1	0	41	2	786.42	1571.83	0.673036	27.1496	6941	6941	MS2	0/0	3kptc_product_trypsin-2ul_2.raw
	High	VTVEHPDKLEEKFPQVAATGDGPDIIFWAHDR	Unambiguous	1	1	3kptCTag-MBP		CID	1	0	1	1			0	0.0005101	3.97673	2	7.45276	250	5	724.369	3617.81	3.30561	36.0181	12165	12165	MS2	0/0	3kptc_product_trypsin-2ul_2.raw
	High	VTVEHPDKLEEKFPQVAATGDGPDIIFWAHDR	Unambiguous	1	1	3kptCTag-MBP		CID	1	0	1	1		1261977148	0	0.0002625	3.97037	2	9.18222	13	5	724.367	3617.8	0.353234	28.4931	7764	7764	MS2	0/0	3kptc_product_trypsin-2ul_2.raw
	High	HMNADTDYSIAEAAFNKGETAmTINGPWAWSNIDTSK	Unambiguous	1	1	3kptCTag-MBP	M22(Oxidation)	CID	1	0	1	1			0.001	0.002672	3.94986	1	43.3678	41	3	1358.61	4073.83	0.452877	32.7715	10371	10371	MS2	0/0	3kptc_product_trypsin-2ul_2.raw
	High	HMNADTDYSIAEAAFNK	Unambiguous	1	1	3kptCTag-MBP		CID	1	0	1	1		2.79123e+06	0	3.565e-05	3.90346	0	100	31	2	949.423	1897.84	0.368681	26.7897	6742	6742	MS2	0/0	3kptc_product_trypsin-2ul_2.raw
	High	FGGYAQSGLLAEITPDK	Unambiguous	1	1	3kptCTag-MBP		CID	1	0	1	1		1.50455e+06	0	0.0004614	3.89944	0	24.7134	32	2	883.953	1766.9	1.18716	36.5839	12452	12452	MS2	0/0	3kptc_product_trypsin-2ul_2.raw
	High	HMNADTDYSIAEAAFNKGETAmTINGPWAWSNIDTSK	Unambiguous	1	1	3kptCTag-MBP	M22(Oxidation)	CID	1	0	1	1			0	0.0006597	3.84681	1	14.3657	42	4	1019.21	4073.83	1.09381	37.0686	12772	12772	MS2	0/0	3kptc_product_trypsin-2ul_2.raw
	High	HmNADTDYSIAEAAFNKGETAmTINGPWAWSNIDTSK	Unambiguous	1	1	3kptCTag-MBP	M2(Oxidation); M22(Oxidation)	CID	1	0	1	1			0	4.889e-05	3.82811	1	16.1232	39	4	1023.21	4089.84	2.9298	32.2091	10056	10056	MS2	0/0	3kptc_product_trypsin-2ul_2.raw
	High	YNGKLIAYPIAVEALSLIYNK	Unambiguous	1	1	3kptCTag-MBP		CID	1	0	1	1		339925	0	7.224e-07	3.82768	1	46.1905	41	3	785.11	2353.32	-0.149987	36.2585	12294	12294	MS2	0/0	3kptc_product_trypsin-2ul_2.raw
	High	HMNADTDYSIAEAAFNKGETAmTINGPWAWSNIDTSK	Unambiguous	1	1	3kptCTag-MBP	M22(Oxidation)	CID	1	0	1	1		7.81332e+06	0	0.0003444	3.81859	1	9.84026	40	4	1019.21	4073.83	0.914025	34.7668	11474	11474	MS2	0/0	3kptc_product_trypsin-2ul_2.raw
	High	ELAKEFLENYLLTDEGLEAVNK	Unambiguous	1	1	3kptCTag-MBP		CID	1	0	1	1		4.86183e+06	0	2.663e-06	3.80199	1	17.0467	42	3	846.771	2538.3	0.588208	36.5051	12405	12405	MS2	0/0	3kptc_product_trypsin-2ul_2.raw
	High	GEIMPNIPQmSAFWYAVR	Unambiguous	1	1	3kptCTag-MBP	M10(Oxidation)	CID	1	0	1	1		2.23968e+08	0	3.733e-07	3.80189	0	2.89317	41	3	709.345	2126.02	-0.0361036	32.5064	10217	10217	MS2	0/0	3kptc_product_trypsin-2ul_2.raw
	High	NKHMNADTDYSIAEAAFNK	Unambiguous	1	1	3kptCTag-MBP		CID	1	0	1	1		1.85563e+06	0	5.251e-06	3.80042	1	0	131	2	1070.49	2139.98	-0.396156	24.1465	5148	5148	MS2	0/0	3kptc_product_trypsin-2ul_2.raw
	High	FGGYAQSGLLAEITPDK	Unambiguous	1	1	3kptCTag-MBP		CID	1	0	1	1		1.53535e+07	0	3.377e-05	3.79811	0	63.8298	42	3	589.633	1766.88	-7.07645	27.284	7006	7006	MS2	0/0	3kptc_product_trypsin-2ul_2.raw
	High	YDIKDVGVDNAGAK	Unambiguous	1	1	3kptCTag-MBP		CID	1	0	1	1			0	3.439e-06	3.78115	1	78.69	29	3	488.916	1464.73	0.919143	23.4166	4703	4703	MS2	0/0	3kptc_product_trypsin-2ul_2.raw
	High	VNYGVTVLPTFK	Unambiguous	1	1	3kptCTag-MBP		CID	1	0	1	1			0	1.674e-05	3.7642	0	2.75489	20	2	669.377	1337.75	0.345709	29.8553	8542	8542	MS2	0/0	3kptc_product_trypsin-2ul_2.raw
	High	GEImPNIPQmSAFWYAVR	Unambiguous	1	1	3kptCTag-MBP	M4(Oxidation); M10(Oxidation)	CID	1	0	1	1			0	6.502e-05	3.74382	0	28.4241	41	2	1071.51	2142.02	0.292789	32.0259	9936	9936	MS2	0/0	3kptc_product_trypsin-2ul_2.raw
	High	IAATmENAQKGEImPNIPQmSAFWYAVR	Unambiguous	1	1	3kptCTag-MBP	M5(Oxidation); M14(Oxidation); M20(Oxidation)	CID	1	0	1	1		9.57741e+06	0	7.52e-06	3.70196	1	26.0864	43	4	804.64	3215.54	1.81071	28.7037	7888	7888	MS2	0/0	3kptc_product_trypsin-2ul_2.raw
	High	LEEKFPQVAATGDGPDIIFWAHDR	Unambiguous	1	1	3kptCTag-MBP		CID	1	0	1	1		3.76589e+07	0	1.296e-07	3.69153	1	33.0137	32	4	678.842	2712.35	1.76859	29.9478	8605	8605	MS2	0/0	3kptc_product_trypsin-2ul_2.raw
	High	LIAYPIAVEALSLIYNK	Unambiguous	1	1	3kptCTag-MBP		CID	1	0	1	1		1.07055e+06	0	2.696e-07	3.65713	0	24.7297	50	3	631.037	1891.1	1.47722	36.6524	12496	12496	MS2	0/0	3kptc_product_trypsin-2ul_2.raw
	High	VNYGVTVLPTFK	Unambiguous	1	1	3kptCTag-MBP		CID	1	0	1	1		5498809	0	4.458e-06	3.64223	0	63.1122	40	2	669.377	1337.75	-0.293046	31.0401	9286	9286	MS2	0/0	3kptc_product_trypsin-2ul_2.raw
	High	DKPLGAVALK	Unambiguous	1	1	3kptCTag-MBP		CID	1	0	1	1			0	7.264e-06	3.60373	0	41.2229	250	3	337.878	1011.62	-1.25335	27.9135	7378	7378	MS2	0/0	3kptc_product_trypsin-2ul_2.raw
	High	VNYGVTVLPTFK	Unambiguous	1	1	3kptCTag-MBP		CID	1	0	1	1		636786	0	2.707e-05	3.59556	0	0	43	2	669.376	1337.74	-1.29681	36.2004	12254	12254	MS2	0/0	3kptc_product_trypsin-2ul_2.raw
	High	YDIKDVGVDNAGAK	Unambiguous	1	1	3kptCTag-MBP		CID	1	0	1	1		1.1196e+09	0	1.373e-07	3.57611	1	39.6964	42	3	488.916	1464.73	0.419105	22.0626	3825	3825	MS2	0/0	3kptc_product_trypsin-2ul_2.raw
	High	AGLTFLVDLIK	Unambiguous	1	1	3kptCTag-MBP		CID	1	0	1	1		9.35542e+06	0	8.427e-06	3.5695	0	6.90978	41	2	595.363	1189.72	0.318328	37.8382	13176	13176	MS2	0/0	3kptc_product_trypsin-2ul_2.raw
	High	GEImPNIPQmSAFWYAVR	Unambiguous	1	1	3kptCTag-MBP	M4(Oxidation); M10(Oxidation)	CID	1	0	1	1		1.63076e+07	0	7.637e-05	3.54106	0	30.0709	40	2	1071.51	2142.01	-1.98676	33.0841	10527	10527	MS2	0/0	3kptc_product_trypsin-2ul_2.raw
	High	SALmFNLQEPYFTWPLIAADGGYAFK	Unambiguous	1	1	3kptCTag-MBP	M4(Oxidation)	CID	1	0	1	1		1.40679e+06	0	0.0005465	3.51052	0	0	43	2	1483.73	2966.45	0.806379	39.0465	13784	13784	MS2	0/0	3kptc_product_trypsin-2ul_2.raw
	High	GSHHHHHHGSTVK	Unambiguous	1	1	3kptCTag-MBP		CID	1	0	1	1			0	1.455e-08	3.5025	0	12.4626	250	4	365.178	1457.69	-0.683343	30.6272	8997	8997	MS2	0/0	3kptc_product_trypsin-2ul_2.raw
	High	GSHHHHHHGSTVK	Unambiguous	1	1	3kptCTag-MBP		CID	1	0	1	1			0	3.875e-08	3.49517	0	0	38	4	365.178	1457.69	-0.432116	27.3287	7033	7033	MS2	0/0	3kptc_product_trypsin-2ul_2.raw
	High	GQPSKPFVGVLSAGINAASPNK	Unambiguous	1	1	3kptCTag-MBP		CID	1	0	1	1		1.22806e+07	0	3.246e-08	3.47292	0	39.3166	41	4	535.545	2139.16	1.08008	27.07	6920	6920	MS2	0/0	3kptc_product_trypsin-2ul_2.raw
	High	FPQVAATGDGPDIIFWAHDR	Unambiguous	1	1	3kptCTag-MBP		CID	1	0	1	1		663405	0	1.129e-06	3.4694	0	39.7022	40	3	738.363	2213.07	-1.67895	38.5255	13538	13538	MS2	0/0	3kptc_product_trypsin-2ul_2.raw
	High	YDIKDVGVDNAGAK	Unambiguous	1	1	3kptCTag-MBP		CID	1	0	1	1			0	5.947e-07	3.45239	1	0	39	3	488.916	1464.73	0.919143	23.3398	4672	4672	MS2	0/0	3kptc_product_trypsin-2ul_2.raw
	High	HMNADTDYSIAEAAFNKGETAMTINGPWAWSNIDTSK	Unambiguous	1	1	3kptCTag-MBP		CID	1	0	1	1		1.76433e+06	0	0.0005016	3.43505	1	0	42	5	812.372	4057.83	0.0221751	31.2809	9448	9448	MS2	0/0	3kptc_product_trypsin-2ul_2.raw
	High	HMNADTDYSIAEAAFNKGETAmTINGPWAWSNIDTSK	Unambiguous	1	1	3kptCTag-MBP	M22(Oxidation)	CID	1	0	1	1			0	0.0006462	3.42933	1	74.9117	42	4	1019.21	4073.83	0.0750196	29.8054	8511	8511	MS2	0/0	3kptc_product_trypsin-2ul_2.raw
	High	TWEEIPALDKELK	Unambiguous	1	1	3kptCTag-MBP		CID	1	0	1	1		7.49583e+06	0	1.459e-05	3.42491	1	26.1341	29	2	786.419	1571.83	-1.03551	28.6627	7860	7860	MS2	0/0	3kptc_product_trypsin-2ul_2.raw
	High	FPQVAATGDGPDIIFWAHDR	Unambiguous	1	1	3kptCTag-MBP		CID	1	0	1	1		120108	0	3.248e-05	3.42455	0	29.9586	43	2	1107.04	2213.08	2.16065	32.1037	9990	9990	MS2	0/0	3kptc_product_trypsin-2ul_2.raw
	High	NKHmNADTDYSIAEAAFNKGETAmTINGPWAWSNIDTSK	Unambiguous	1	1	3kptCTag-MBP	M4(Oxidation); M24(Oxidation)	CID	1	0	1	1		5.36716e+06	0	0.001764	3.4087	2	62.6418	38	5	867.2	4331.97	2.15211	30.961	9226	9226	MS2	0/0	3kptc_product_trypsin-2ul_2.raw
	High	VNYGVTVLPTFK	Unambiguous	1	1	3kptCTag-MBP		CID	1	0	1	1			0	0.000158	3.40784	0	3.5568	10	2	669.377	1337.75	0.0719566	29.6611	8413	8413	MS2	0/0	3kptc_product_trypsin-2ul_2.raw
	High	HMNADTDYSIAEAAFNKGETAmTINGPWAWSNIDTSK	Unambiguous	1	1	3kptCTag-MBP	M22(Oxidation)	CID	1	0	1	1			0.002	0.01683	3.40678	1	25.3929	41	5	815.573	4073.83	1.51001	32.6143	10285	10285	MS2	0/0	3kptc_product_trypsin-2ul_2.raw
	High	GSHHHHHHGSTVK	Unambiguous	1	1	3kptCTag-MBP		CID	1	0	1	1			0	6.18e-08	3.38731	0	0	33	4	365.178	1457.69	-0.0971467	21.3038	3466	3466	MS2	0/0	3kptc_product_trypsin-2ul_2.raw
	High	VNYGVTVLPTFK	Unambiguous	1	1	3kptCTag-MBP		CID	1	0	1	1			0	5.857e-05	3.37839	0	17.8308	42	2	669.377	1337.75	0.0719566	31.704	9740	9740	MS2	0/0	3kptc_product_trypsin-2ul_2.raw
	High	GEImPNIPQmSAFWYAVR	Unambiguous	1	1	3kptCTag-MBP	M4(Oxidation); M10(Oxidation)	CID	1	0	1	1		1.6325e+06	0	7.388e-05	3.36894	0	0	37	3	714.676	2142.01	-0.767777	34.1568	11138	11138	MS2	0/0	3kptc_product_trypsin-2ul_2.raw
	High	DTGIKVTVEHPDKLEEK	Unambiguous	1	1	3kptCTag-MBP		CID	1	0	1	1		9.54251e+06	0	5.994e-05	3.36774	2	15.977	26	4	485.26	1938.02	0.0752378	21.0852	3339	3339	MS2	0/0	3kptc_product_trypsin-2ul_2.raw
	High	DKPLGAVALK	Unambiguous	1	1	3kptCTag-MBP		CID	1	0	1	1			0	4.797e-05	3.3665	0	28.0464	80	3	337.878	1011.62	-0.619838	25.5327	6004	6004	MS2	0/0	3kptc_product_trypsin-2ul_2.raw
	High	LYPFTWDAVR	Unambiguous	1	1	3kptCTag-MBP		CID	1	0	1	1		1.13799e+06	0	0.0001892	3.35663	0	46.817	114	3	423.221	1267.65	0.26957	26.4036	6466	6466	MS2	0/0	3kptc_product_trypsin-2ul_2.raw
	High	YDIKDVGVDNAGAK	Unambiguous	1	1	3kptCTag-MBP		CID	1	0	1	1		517980	0	7.639e-07	3.34224	1	42.8622	42	3	488.915	1464.73	-1.89357	24.4332	5335	5335	MS2	0/0	3kptc_product_trypsin-2ul_2.raw
	High	LIAYPIAVEALSLIYNK	Unambiguous	1	1	3kptCTag-MBP		CID	1	0	1	1			0	1.68e-06	3.34223	0	31.6306	250	3	631.036	1891.09	0.121675	32.7046	10348	10348	MS2	0/0	3kptc_product_trypsin-2ul_2.raw
	High	FGGYAQSGLLAEITPDKAFQDK	Unambiguous	1	1	3kptCTag-MBP		CID	1	0	1	1		5.87592e+06	0	0.0004388	3.3417	1	23.1031	43	3	786.066	2356.18	0.48356	32.5073	10218	10218	MS2	0/0	3kptc_product_trypsin-2ul_2.raw
	High	AFQDKLYPFTWDAVR	Unambiguous	1	1	3kptCTag-MBP		CID	1	0	1	1			0	1.527e-05	3.33028	1	14.0779	250	3	619.65	1856.94	1.7131	36.3659	12353	12353	MS2	0/0	3kptc_product_trypsin-2ul_2.raw
	High	LIAYPIAVEALSLIYNKDLLPNPPK	Unambiguous	1	1	3kptCTag-MBP		CID	1	0	1	1			0	1.232e-05	3.32977	1	73.7695	40	4	692.152	2765.59	0.112343	39.8681	14175	14175	MS2	0/0	3kptc_product_trypsin-2ul_2.raw
	High	AGLTFLVDLIK	Unambiguous	1	1	3kptCTag-MBP		CID	1	0	1	1			0	0.0002492	3.31664	0	0	42	3	397.244	1189.72	-0.462507	31.2639	9432	9432	MS2	0/0	3kptc_product_trypsin-2ul_2.raw
	High	NKHmNADTDYSIAEAAFNK	Unambiguous	1	1	3kptCTag-MBP	M4(Oxidation)	CID	1	0	1	1			0.001	0.003119	3.30381	1	40.0516	41	3	719.33	2155.97	1.6477	24.4623	5347	5347	MS2	0/0	3kptc_product_trypsin-2ul_2.raw
	High	GEImPNIPQMSAFWYAVR	Unambiguous	1	1	3kptCTag-MBP	M4(Oxidation)	CID	0.0428	0	1	1			0	2.203e-05	3.27291	0	21.679	40	3	709.343	2126.01	-2.96439	36.0624	12181	12181	MS2	0/0	3kptc_product_trypsin-2ul_2.raw
	High	GEIMPNIPQMSAFWYAVR	Unambiguous	1	1	3kptCTag-MBP		CID	1	0	1	1		3.15029e+06	0	0.0002828	3.25023	0	13.8905	39	3	704.013	2110.03	0.185989	37.7085	13104	13104	MS2	0/0	3kptc_product_trypsin-2ul_2.raw
	High	FGGYAQSGLLAEITPDK	Unambiguous	1	1	3kptCTag-MBP		CID	1	0	1	1		3.27542e+06	0	0.001881	3.22729	0	50.3521	37	2	883.95	1766.89	-1.57634	27.3305	7035	7035	MS2	0/0	3kptc_product_trypsin-2ul_2.raw
	High	NKHmNADTDYSIAEAAFNK	Unambiguous	1	1	3kptCTag-MBP	M4(Oxidation)	CID	1	0	1	1			0	0.0002902	3.22094	1	0	250	2	1078.49	2155.96	-3.47015	24.3001	5253	5253	MS2	0/0	3kptc_product_trypsin-2ul_2.raw
	High	LIAYPIAVEALSLIYNKDLLPNPPK	Unambiguous	1	1	3kptCTag-MBP		CID	1	0	1	1			0	3.173e-06	3.21575	1	66.4772	200	5	553.923	2765.59	0.284037	38.1704	13338	13338	MS2	0/0	3kptc_product_trypsin-2ul_2.raw
	High	IAATMENAQKGEIMPNIPQMSAFWYAVR	Unambiguous	1	1	3kptCTag-MBP		CID	1	0	1	1			0.004	0.03196	3.1991	1	61.184	42	4	792.644	3167.55	2.18618	31.5113	9603	9603	MS2	0/0	3kptc_product_trypsin-2ul_2.raw
	High	ELAKEFLENYLLTDEGLEAVNK	Unambiguous	1	1	3kptCTag-MBP		CID	1	0	1	1		465298	0.001	0.003553	3.17927	1	74.1846	42	3	846.773	2538.3	2.89659	32.3578	10141	10141	MS2	0/0	3kptc_product_trypsin-2ul_2.raw
	High	VTVEHPDKLEEKFPQVAATGDGPDIIFWAHDR	Unambiguous	1	1	3kptCTag-MBP		CID	1	0	1	1		1.63309e+06	0	0.002136	3.14035	2	3.43208	42	5	724.367	3617.8	0.26888	33.8709	10961	10961	MS2	0/0	3kptc_product_trypsin-2ul_2.raw
	High	GEIMPNIPQmSAFWYAVR	Unambiguous	1	1	3kptCTag-MBP	M10(Oxidation)	CID		0.0428	2	2			0	0.0004469	3.1269	0	21.679	40	3	709.343	2126.01	-2.96439	36.0624	12181	12181	MS2	0/0	3kptc_product_trypsin-2ul_2.raw
	High	VNYGVTVLPTFK	Unambiguous	1	1	3kptCTag-MBP		CID	1	0	1	1			0	0.0001178	3.12295	0	23.9177	42	2	669.378	1337.75	0.984463	36.3607	12348	12348	MS2	0/0	3kptc_product_trypsin-2ul_2.raw
	High	GQPSKPFVGVLSAGINAASPNKELAK	Unambiguous	1	1	3kptCTag-MBP		CID	1	0	1	1			0	1.039e-05	3.06426	1	15.4913	43	3	860.809	2580.41	-0.365418	28.976	8025	8025	MS2	0/0	3kptc_product_trypsin-2ul_2.raw
	High	EFLENYLLTDEGLEAVNK	Unambiguous	1	1	3kptCTag-MBP		CID	1	0	1	1			0	0.0002202	3.03871	0	10.2309	41	3	699.685	2097.04	0.814541	37.2181	12861	12861	MS2	0/0	3kptc_product_trypsin-2ul_2.raw
	High	FGGYAQSGLLAEITPDK	Unambiguous	1	1	3kptCTag-MBP		CID	1	0	1	1		8.65359e+06	0	0.0006883	3.02601	0	30.1549	39	3	589.637	1766.9	0.177782	28.3612	7662	7662	MS2	0/0	3kptc_product_trypsin-2ul_2.raw
	High	SALmFNLQEPYFTWPLIAADGGYAFKYENGK	Unambiguous	1	1	3kptCTag-MBP	M4(Oxidation)	CID	1	0	1	1		883875	0.001	0.003074	3.01758	1	0	41	3	1186.57	3557.7	-2.13658	36.2198	12269	12269	MS2	0/0	3kptc_product_trypsin-2ul_2.raw
	High	GSHHHHHHGSTVK	Unambiguous	1	1	3kptCTag-MBP		CID	1	0	1	1		178778	0	1.494e-07	3.00681	0	24.0482	250	4	365.178	1457.69	0.15408	38.8063	13676	13676	MS2	0/0	3kptc_product_trypsin-2ul_2.raw
	High	LVIWINGDKGYNGLAEVGK	Unambiguous	1	1	3kptCTag-MBP		CID	1	0	1	1		1.85664e+08	0	7.185e-09	3.00465	1	24.2488	250	3	682.706	2046.1	0.72157	28.7575	7912	7912	MS2	0/0	3kptc_product_trypsin-2ul_2.raw
	High	GEIMPNIPQMSAFWYAVR	Unambiguous	1	1	3kptCTag-MBP		CID	1	0	1	1			0	1.798e-05	2.97837	0	1.92035	40	2	1055.52	2110.02	-0.588648	41.4883	14683	14683	MS2	0/0	3kptc_product_trypsin-2ul_2.raw
	High	DKPLGAVALK	Unambiguous	1	1	3kptCTag-MBP		CID	1	0	1	1			0	2.656e-05	2.97036	0	57.9459	250	3	337.878	1011.62	-0.529337	28.7177	7895	7895	MS2	0/0	3kptc_product_trypsin-2ul_2.raw
	High	DKPLGAVALK	Unambiguous	1	1	3kptCTag-MBP		CID	1	0	1	1		1.94743e+09	0	0.0002288	2.94681	0	5.70893	10	3	337.878	1011.62	-0.348335	21.4354	3529	3529	MS2	0/0	3kptc_product_trypsin-2ul_2.raw
	High	GSHHHHHHGSTVK	Unambiguous	1	1	3kptCTag-MBP		CID	1	0	1	1			0	8.043e-07	2.93859	0	61.0841	250	4	365.179	1457.69	2.08015	35.9488	12146	12146	MS2	0/0	3kptc_product_trypsin-2ul_2.raw
	High	GSHHHHHHGSTVK	Unambiguous	1	1	3kptCTag-MBP		CID	1	0	1	1			0	9.428e-06	2.93792	0	65.747	32	4	365.177	1457.69	-1.10206	22.861	4364	4364	MS2	0/0	3kptc_product_trypsin-2ul_2.raw
	High	GSHHHHHHGSTVK	Unambiguous	1	1	3kptCTag-MBP		CID	1	0	1	1			0	3.482e-07	2.92367	0	0	41	4	365.178	1457.69	-0.432116	28.364	7665	7665	MS2	0/0	3kptc_product_trypsin-2ul_2.raw
	High	GSHHHHHHGSTVK	Unambiguous	1	1	3kptCTag-MBP		CID	1	0	1	1			0	6.526e-07	2.91214	0	4.63849	250	4	365.178	1457.69	-0.683343	31.8284	9814	9814	MS2	0/0	3kptc_product_trypsin-2ul_2.raw
	High	FPQVAATGDGPDIIFWAHDR	Unambiguous	1	1	3kptCTag-MBP		CID	1	0	1	1		1.91973e+06	0	1.518e-06	2.90214	0	37.6995	42	3	738.365	2213.08	1.96152	36.5061	12406	12406	MS2	0/0	3kptc_product_trypsin-2ul_2.raw
	High	AFQDKLYPFTWDAVR	Unambiguous	1	1	3kptCTag-MBP		CID	1	0	1	1		353403	0	0.0004182	2.90041	1	0	39	3	619.649	1856.93	0.431218	34.2587	11210	11210	MS2	0/0	3kptc_product_trypsin-2ul_2.raw
	High	VNYGVTVLPTFK	Unambiguous	1	1	3kptCTag-MBP		CID	1	0	1	1			0	3.292e-05	2.89904	0	19.3563	33	2	669.377	1337.75	0.710711	38.3756	13448	13448	MS2	0/0	3kptc_product_trypsin-2ul_2.raw
	High	DKPLGAVALK	Unambiguous	1	1	3kptCTag-MBP		CID	1	0	1	1			0	0.000203	2.88765	0	53.4525	36	3	337.878	1011.62	-0.348335	24.5136	5370	5370	MS2	0/0	3kptc_product_trypsin-2ul_2.raw
	High	AGLTFLVDLIK	Unambiguous	1	1	3kptCTag-MBP		CID	1	0	1	1			0	0.0006646	2.85695	0	0	250	3	397.245	1189.72	0.230072	32.2974	10113	10113	MS2	0/0	3kptc_product_trypsin-2ul_2.raw
	High	ELAKEFLENYLLTDEGLEAVNKDKPLGAVALK	Unambiguous	1	1	3kptCTag-MBP		CID	1	0	1	1		682992	0	0.001302	2.85604	2	27.6867	48	5	706.986	3530.9	0.881592	32.2925	10108	10108	MS2	0/0	3kptc_product_trypsin-2ul_2.raw
	High	VNYGVTVLPTFK	Unambiguous	1	1	3kptCTag-MBP		CID	1	0	1	1		1.97932e+06	0	0.0004648	2.8401	0	11.5069	38	2	669.377	1337.75	0.801962	33.0919	10531	10531	MS2	0/0	3kptc_product_trypsin-2ul_2.raw
	High	VNYGVTVLPTFK	Unambiguous	1	1	3kptCTag-MBP		CID	1	0	1	1			0	0.0001585	2.83986	0	36.0326	59	2	669.377	1337.75	0.52821	40.3999	14333	14333	MS2	0/0	3kptc_product_trypsin-2ul_2.raw
	High	GQPSKPFVGVLSAGINAASPNK	Unambiguous	1	1	3kptCTag-MBP		CID	1	0	1	1			0	4.508e-05	2.82669	0	0.708698	24	3	713.724	2139.16	0.601316	26.9254	6832	6832	MS2	0/0	3kptc_product_trypsin-2ul_2.raw
	High	LVIWINGDKGYNGLAEVGKK	Unambiguous	1	1	3kptCTag-MBP		CID	1	0	1	1			0	0.0002651	2.8237	2	0	43	2	1087.6	2174.2	1.9769	27.3218	7028	7028	MS2	0/0	3kptc_product_trypsin-2ul_2.raw
	High	NKHmNADTDYSIAEAAFNK	Unambiguous	1	1	3kptCTag-MBP	M4(Oxidation)	CID	1	0	1	1		1.03199e+08	0	0.0004799	2.81755	1	57.1401	41	4	539.749	2155.97	0.763862	23.4814	4728	4728	MS2	0/0	3kptc_product_trypsin-2ul_2.raw
	High	GSGESGKIEEGK	Unambiguous	1	1	3kptCTag-MBP		CID	1	0	1	1		109065	0	3.712e-05	2.7988	1	12.6845	106	2	589.288	1177.57	-0.176434	16.6864	1722	1722	MS2	0/0	3kptc_product_trypsin-2ul_2.raw
	High	FGGYAQSGLLAEITPDKAFQDK	Unambiguous	1	1	3kptCTag-MBP		CID	1	0	1	1		1.67893e+06	0	0.0001211	2.79832	1	23.3391	35	4	589.801	2356.18	0.0892896	27.9585	7400	7400	MS2	0/0	3kptc_product_trypsin-2ul_2.raw
	High	FGGYAQSGLLAEITPDK	Unambiguous	1	1	3kptCTag-MBP		CID	1	0	1	1			0.001	0.006777	2.7885	0	7.7399	11	2	883.95	1766.89	-1.50725	38.5977	13584	13584	MS2	0/0	3kptc_product_trypsin-2ul_2.raw
	High	GEIMPNIPQMSAFWYAVR	Unambiguous	1	1	3kptCTag-MBP		CID	1	0	1	1		5.73619e+06	0.001	0.01116	2.78179	0	24.4439	41	3	704.013	2110.02	0.0124317	31.4052	9541	9541	MS2	0/0	3kptc_product_trypsin-2ul_2.raw
	High	VTVEHPDKLEEKFPQVAATGDGPDIIFWAHDR	Unambiguous	1	1	3kptCTag-MBP		CID	1	0	1	1		197779	0	0.001856	2.7754	2	23.7135	78	5	724.368	3617.81	1.8716	38.1596	13331	13331	MS2	0/0	3kptc_product_trypsin-2ul_2.raw
	High	LIAYPIAVEALSLIYNKDLLPNPPK	Unambiguous	1	1	3kptCTag-MBP		CID	1	0	1	1		1.7796e+06	0	0.0001649	2.77294	1	8.17761	191	2	1383.3	2765.59	0.342763	37.9441	13233	13233	MS2	0/0	3kptc_product_trypsin-2ul_2.raw
	High	VNYGVTVLPTFK	Unambiguous	1	1	3kptCTag-MBP		CID	1	0	1	1		587498	0	0.0001495	2.76812	0	25.6023	37	2	669.376	1337.75	-0.65805	34.1223	11111	11111	MS2	0/0	3kptc_product_trypsin-2ul_2.raw
	High	GETAMTINGPWAWSNIDTSK	Unambiguous	1	1	3kptCTag-MBP		CID	1	0	1	1		1.2805e+08	0	0.0002272	2.75267	0	10.8737	2	3	727.01	2179.01	0.838046	31.5504	9623	9623	MS2	0/0	3kptc_product_trypsin-2ul_2.raw
	High	GSHHHHHHGSTVK	Unambiguous	1	1	3kptCTag-MBP		CID	1	0	1	1			0	6.373e-07	2.74707	0	2.88919	33	4	365.178	1457.69	0.15408	16.8898	1800	1800	MS2	0/0	3kptc_product_trypsin-2ul_2.raw
	High	HMNADTDYSIAEAAFNK	Unambiguous	1	1	3kptCTag-MBP		CID	1	0	1	1			0	0.0001524	2.74046	0	57.3369	37	3	633.285	1897.84	0.940481	27.9042	7372	7372	MS2	0/0	3kptc_product_trypsin-2ul_2.raw
	High	DLLPNPPKTWEEIPALDKELK	Unambiguous	1	1	3kptCTag-MBP		CID	1	0	1	1		9.16456e+06	0.001	0.002936	2.73925	2	44.9642	41	3	816.114	2446.33	1.33863	30.4438	8893	8893	MS2	0/0	3kptc_product_trypsin-2ul_2.raw
	High	AGLTFLVDLIK	Unambiguous	1	1	3kptCTag-MBP		CID	1	0	1	1			0	0.0002268	2.73249	0	13.6353	250	3	397.245	1189.72	0.307025	33.8302	10947	10947	MS2	0/0	3kptc_product_trypsin-2ul_2.raw
	High	GSHHHHHHGSTVK	Unambiguous	1	1	3kptCTag-MBP		CID	1	0	1	1			0	6.443e-07	2.71944	0	0	250	4	365.178	1457.69	0.321565	33.0616	10520	10520	MS2	0/0	3kptc_product_trypsin-2ul_2.raw
	High	YDIKDVGVDNAGAK	Unambiguous	1	1	3kptCTag-MBP		CID	1	0	1	1			0	0.001814	2.70647	1	0	25	2	732.871	1464.74	1.65754	23.3568	4680	4680	MS2	0/0	3kptc_product_trypsin-2ul_2.raw
	High	AFQDKLYPFTWDAVR	Unambiguous	1	1	3kptCTag-MBP		CID	1	0	1	1		273491	0	0.0007872	2.70282	1	36.0672	43	3	619.649	1856.93	0.234005	38.5059	13526	13526	MS2	0/0	3kptc_product_trypsin-2ul_2.raw
	High	AGLTFLVDLIK	Unambiguous	1	1	3kptCTag-MBP		CID	1	0	1	1			0	0.0003022	2.69938	0	12.5564	15	2	595.363	1189.72	-0.0920895	38.8446	13692	13692	MS2	0/0	3kptc_product_trypsin-2ul_2.raw
	High	GSGESGKIEEGKLVIWINGDK	Unambiguous	1	1	3kptCTag-MBP		CID	1	0	1	1		5.04602e+07	0	1.268e-05	2.69093	2	52.0519	41	4	554.795	2216.16	1.23129	26.0395	6291	6291	MS2	0/0	3kptc_product_trypsin-2ul_2.raw
	High	MRGSHHHHHHGSTVK	Unambiguous	1	1	3kptCTag-MBP		CID	1	0	1	1		255035	0.004	0.03389	2.68983	1	0	250	5	349.772	1744.83	0.302843	28.1262	7510	7510	MS2	0/0	3kptc_product_trypsin-2ul_2.raw
	High	AGLTFLVDLIK	Unambiguous	1	1	3kptCTag-MBP		CID	1	0	1	1		2.24828e+07	0	2.799e-05	2.68382	0	15.0882	41	2	595.363	1189.72	0.215723	34.8038	11501	11501	MS2	0/0	3kptc_product_trypsin-2ul_2.raw
	High	GQPSKPFVGVLSAGINAASPNKELAK	Unambiguous	1	1	3kptCTag-MBP		CID	1	0	1	1			0	1.05e-06	2.64564	1	25.5254	42	4	645.858	2580.41	-1.36407	28.2408	7582	7582	MS2	0/0	3kptc_product_trypsin-2ul_2.raw
	High	EFLENYLLTDEGLEAVNK	Unambiguous	1	1	3kptCTag-MBP		CID	1	0	1	1		631061	0	0.000442	2.64251	0	18.1503	22	2	1049.02	2097.04	1.57769	40.1238	14255	14255	MS2	0/0	3kptc_product_trypsin-2ul_2.raw
	High	DKPLGAVALK	Unambiguous	1	1	3kptCTag-MBP		CID	1	0	1	1			0	0.0003802	2.63367	0	7.07872	8	3	337.878	1011.62	-1.07234	23.5064	4740	4740	MS2	0/0	3kptc_product_trypsin-2ul_2.raw
	High	LIAYPIAVEALSLIYNKDLLPNPPK	Unambiguous	1	1	3kptCTag-MBP		CID	1	0	1	1		158072	0.001	0.003138	2.63311	1	42.3192	41	4	692.151	2765.58	-0.68216	36.2679	12303	12303	MS2	0/0	3kptc_product_trypsin-2ul_2.raw
	High	TWEEIPALDK	Unambiguous	1	1	3kptCTag-MBP		CID	1	0	1	1		1.16979e+06	0	6.107e-05	2.59773	0	24.581	42	2	601.308	1201.61	-0.574872	29.8132	8517	8517	MS2	0/0	3kptc_product_trypsin-2ul_2.raw
	High	TWEEIPALDKELK	Unambiguous	1	1	3kptCTag-MBP		CID	1	0	1	1		519960	0	4.745e-05	2.5802	1	10.6445	250	3	524.616	1571.83	0.625651	34.672	11426	11426	MS2	0/0	3kptc_product_trypsin-2ul_2.raw
	High	GEImPNIPQmSAFWYAVR	Unambiguous	1	1	3kptCTag-MBP	M4(Oxidation); M10(Oxidation)	CID	1	0	1	1		1.6325e+06	0	0.000917	2.57459	0	45.8591	40	3	714.676	2142.01	-0.169397	34.3678	11278	11278	MS2	0/0	3kptc_product_trypsin-2ul_2.raw
	High	LIAYPIAVEALSLIYNKDLLPNPPK	Unambiguous	1	1	3kptCTag-MBP		CID	1	0	1	1		953327	0	4.53e-05	2.56073	1	0	250	2	1383.3	2765.59	1.49038	38.887	13713	13713	MS2	0/0	3kptc_product_trypsin-2ul_2.raw
	High	GQPSKPFVGVLSAGINAASPNKELAK	Unambiguous	1	1	3kptCTag-MBP		CID	1	0	1	1		328966	0	3.334e-05	2.5547	1	11.971	135	4	645.859	2580.42	0.244356	33.9517	11007	11007	MS2	0/0	3kptc_product_trypsin-2ul_2.raw
	High	IAATmENAQKGEImPNIPQmSAFWYAVR	Unambiguous	1	1	3kptCTag-MBP	M5(Oxidation); M14(Oxidation); M20(Oxidation)	CID	1	0	1	1			0	0.001472	2.55009	1	20.7131	42	4	804.638	3215.53	-1.2263	29.4299	8250	8250	MS2	0/0	3kptc_product_trypsin-2ul_2.raw
	High	VTVEHPDKLEEK	Unambiguous	1	1	3kptCTag-MBP		CID	1	0	1	1			0	0.0003358	2.54993	1	0	130	2	712.375	1423.74	-0.226207	17.634	1939	1939	MS2	0/0	3kptc_product_trypsin-2ul_2.raw
	High	GEIMPNIPQMSAFWYAVR	Unambiguous	1	1	3kptCTag-MBP		CID	1	0	1	1			0	0.001585	2.54198	0	4.52337	36	2	1055.52	2110.03	0.221288	42.4973	14991	14991	MS2	0/0	3kptc_product_trypsin-2ul_2.raw
	High	HmNADTDYSIAEAAFNK	Unambiguous	1	1	3kptCTag-MBP	M2(Oxidation)	CID	1	0	1	1		139041	0	0.0006809	2.54186	0	0	41	2	957.421	1913.84	0.79016	28.1532	7523	7523	MS2	0/0	3kptc_product_trypsin-2ul_2.raw
	High	GSHHHHHHGSTVK	Unambiguous	1	1	3kptCTag-MBP		CID	1	0	1	1			0	0.0001038	2.51196	0	79.0102	250	3	486.568	1457.69	0.351725	27.4783	7125	7125	MS2	0/0	3kptc_product_trypsin-2ul_2.raw
	High	ELAKEFLENYLLTDEGLEAVNK	Unambiguous	1	1	3kptCTag-MBP		CID	1	0	1	1			0.005	0.04897	2.50382	1	23.205	42	3	846.771	2538.3	-0.2053	37.5258	13016	13016	MS2	0/0	3kptc_product_trypsin-2ul_2.raw
	High	TWEEIPALDKELK	Unambiguous	1	1	3kptCTag-MBP		CID	1	0	1	1			0.001	0.007333	2.49458	1	11.7935	24	3	524.616	1571.83	0.858634	39.0367	13778	13778	MS2	0/0	3kptc_product_trypsin-2ul_2.raw
	High	TWEEIPALDK	Unambiguous	1	1	3kptCTag-MBP		CID	1	0	1	1		723173	0	0.0002593	2.48435	0	36.7903	250	2	601.309	1201.61	1.15214	31.527	9614	9614	MS2	0/0	3kptc_product_trypsin-2ul_2.raw
	High	EFLENYLLTDEGLEAVNK	Unambiguous	1	1	3kptCTag-MBP		CID	1	0	1	1			0	1.699e-06	2.4833	0	33.4936	42	2	1049.02	2097.04	0.413478	31.1507	9362	9362	MS2	0/0	3kptc_product_trypsin-2ul_2.raw
	High	GYNGLAEVGK	Unambiguous	1	1	3kptCTag-MBP		CID	1	0	1	1		1.11245e+07	0.001	0.01463	2.46756	0	30.2049	34	2	504.262	1007.52	0.233683	21.2439	3432	3432	MS2	0/0	3kptc_product_trypsin-2ul_2.raw
	High	ELAKEFLENYLLTDEGLEAVNK	Unambiguous	1	1	3kptCTag-MBP		CID	1	0	1	1		72205.5	0.004	0.02441	2.46612	1	0	126	2	1269.66	2538.3	2.85379	35.5248	11968	11968	MS2	0/0	3kptc_product_trypsin-2ul_2.raw
	High	GSHHHHHHGSTVK	Unambiguous	1	1	3kptCTag-MBP		CID	1	0	1	1		6.84474e+06	0	4.486e-05	2.46082	0	0	13	4	365.178	1457.69	0.070338	29.4027	8232	8232	MS2	0/0	3kptc_product_trypsin-2ul_2.raw
	High	FGGYAQSGLLAEITPDKAFQDK	Unambiguous	1	1	3kptCTag-MBP		CID	1	0	1	1		1.01764e+06	0	0.001724	2.45006	1	47.3252	38	3	786.065	2356.18	-0.992984	36.5857	12454	12454	MS2	0/0	3kptc_product_trypsin-2ul_2.raw
	High	TWEEIPALDKELK	Unambiguous	1	1	3kptCTag-MBP		CID	1	0	1	1		6.09834e+06	0	0.0004591	2.44759	1	2.12876	42	3	524.615	1571.83	0.159684	30.0399	8665	8665	MS2	0/0	3kptc_product_trypsin-2ul_2.raw
	High	QTVDEALKDAQTNSSS	Unambiguous	1	1	3kptCTag-MBP		CID	1	0	1	1		2.01249e+06	0.001	0.008643	2.44193	1	0	29	2	847.398	1693.79	0.470175	21.7695	3662	3662	MS2	0/0	3kptc_product_trypsin-2ul_2.raw
	High	TWEEIPALDKELK	Unambiguous	1	1	3kptCTag-MBP		CID	1	0	1	1		437274	0	0.0007567	2.41672	1	57.0013	44	3	524.616	1571.83	0.392668	32.086	9978	9978	MS2	0/0	3kptc_product_trypsin-2ul_2.raw
	High	SALmFNLQEPYFTWPLIAADGGYAFK	Unambiguous	1	1	3kptCTag-MBP	M4(Oxidation)	CID	1	0	1	1			0	0.001485	2.40718	0	3.13451	14	3	989.486	2966.44	-0.473815	40.8875	14503	14503	MS2	0/0	3kptc_product_trypsin-2ul_2.raw
	High	GEImPNIPQmSAFWYAVR	Unambiguous	1	1	3kptCTag-MBP	M4(Oxidation); M10(Oxidation)	CID	1	0	1	1		2.93076e+06	0.001	0.00242	2.3961	0	7.78657	41	2	1071.51	2142.01	-0.0491424	34.1813	11156	11156	MS2	0/0	3kptc_product_trypsin-2ul_2.raw
	High	HmNADTDYSIAEAAFNK	Unambiguous	1	1	3kptCTag-MBP	M2(Oxidation)	CID	1	0	1	1		2.59332e+07	0	0.001202	2.39164	0	13.6109	43	2	957.421	1913.84	0.79016	24.9782	5651	5651	MS2	0/0	3kptc_product_trypsin-2ul_2.raw
	High	FGGYAQSGLLAEITPDKAFQDKLYPFTWDAVR	Unambiguous	1	1	3kptCTag-MBP		CID	1	0	1	1			0	0.0007371	2.38718	2	9.95629	31	4	901.959	3604.82	1.33417	38.8692	13705	13705	MS2	0/0	3kptc_product_trypsin-2ul_2.raw
	High	VNYGVTVLPTFK	Unambiguous	1	1	3kptCTag-MBP		CID	1	0	1	1			0	0.0006703	2.38293	0	27.6979	9	2	669.377	1337.75	0.61946	32.0567	9953	9953	MS2	0/0	3kptc_product_trypsin-2ul_2.raw
	High	TWEEIPALDKELK	Unambiguous	1	1	3kptCTag-MBP		CID	1	0	1	1		727978	0.001	0.002985	2.37347	1	33.4913	42	3	524.616	1571.83	0.276176	31.0628	9301	9301	MS2	0/0	3kptc_product_trypsin-2ul_2.raw
	High	LYPFTWDAVR	Unambiguous	1	1	3kptCTag-MBP		CID	1	0	1	1			0	0.0006886	2.37274	0	50.8133	250	2	634.329	1267.65	3.55425	35.9397	12144	12144	MS2	0/0	3kptc_product_trypsin-2ul_2.raw
	High	GQPSKPFVGVLSAGINAASPNKELAK	Unambiguous	1	1	3kptCTag-MBP		CID	1	0	1	1		9.83935e+06	0	1.703e-05	2.36562	1	16.9541	41	4	645.859	2580.42	0.433581	29.3272	8182	8182	MS2	0/0	3kptc_product_trypsin-2ul_2.raw
	High	GEIMPNIPQMSAFWYAVR	Unambiguous	1	1	3kptCTag-MBP		CID	1	0	1	1		671528	0	0.0003445	2.36261	0	34.155	43	3	704.012	2110.02	-1.02892	38.7131	13636	13636	MS2	0/0	3kptc_product_trypsin-2ul_2.raw
	High	NKHmNADTDYSIAEAAFNK	Unambiguous	1	1	3kptCTag-MBP	M4(Oxidation)	CID	1	0	1	1		2.34683e+06	0.001	0.002869	2.35905	1	0	34	2	1078.49	2155.97	1.17267	23.5255	4751	4751	MS2	0/0	3kptc_product_trypsin-2ul_2.raw
	High	VNYGVTVLPTFK	Unambiguous	1	1	3kptCTag-MBP		CID	1	0	1	1			0.001	0.003232	2.34593	0	32.0569	34	2	669.377	1337.75	0.254458	39.3872	13962	13962	MS2	0/0	3kptc_product_trypsin-2ul_2.raw
	High	EFLENYLLTDEGLEAVNK	Unambiguous	1	1	3kptCTag-MBP		CID	1	0	1	1			0.001	0.00691	2.34056	0	73.8235	42	3	699.684	2097.04	-0.844467	38.312	13414	13414	MS2	0/0	3kptc_product_trypsin-2ul_2.raw
	High	HMNADTDYSIAEAAFNK	Unambiguous	1	1	3kptCTag-MBP		CID	1	0	1	1		2.70286e+06	0	0.001078	2.33045	0	15.7564	29	3	633.284	1897.84	0.168634	23.9589	5022	5022	MS2	0/0	3kptc_product_trypsin-2ul_2.raw
	High	FPQVAATGDGPDIIFWAHDR	Unambiguous	1	1	3kptCTag-MBP		CID	1	0	1	1			0	0.0002403	2.31784	0	5.14564	28	3	738.364	2213.08	0.141286	44.1998	15399	15399	MS2	0/0	3kptc_product_trypsin-2ul_2.raw
	High	YENGKYDIKDVGVDNAGAK	Unambiguous	1	1	3kptCTag-MBP		CID	1	0	1	1		8.24492e+06	0.001	0.01354	2.31091	2	0	32	2	1028.5	2056	0.15635	21.2151	3414	3414	MS2	0/0	3kptc_product_trypsin-2ul_2.raw
	High	TWEEIPALDKELK	Unambiguous	1	1	3kptCTag-MBP		CID	1	0	1	1			0.001	0.004408	2.29288	1	74.3138	36	3	524.613	1571.83	-4.03404	26.9768	6863	6863	MS2	0/0	3kptc_product_trypsin-2ul_2.raw
	High	GEImPNIPQMSAFWYAVR	Unambiguous	1	1	3kptCTag-MBP	M4(Oxidation)	CID	1	0	1	1			0.004	0.03675	2.29068	0	10.0491	43	2	1063.51	2126.02	-0.718787	40.2823	14296	14296	MS2	0/0	3kptc_product_trypsin-2ul_2.raw
	High	GQPSKPFVGVLSAGINAASPNK	Unambiguous	1	1	3kptCTag-MBP		CID	1	0	1	1		476327	0.001	0.002447	2.28502	0	13.2296	43	3	713.723	2139.16	-0.169057	39.0561	13788	13788	MS2	0/0	3kptc_product_trypsin-2ul_2.raw
	High	SALmFNLQEPYFTWPLIAADGGYAFK	Unambiguous	1	1	3kptCTag-MBP	M4(Oxidation)	CID	1	0	1	1			0	0.001258	2.27876	0	6.21179	40	3	989.483	2966.44	-2.57249	43.918	15329	15329	MS2	0/0	3kptc_product_trypsin-2ul_2.raw
	High	QTVDEALKDAQTNSSS	Unambiguous	1	1	3kptCTag-MBP		CID	1	0	1	1			0	0.002013	2.2668	1	12.3035	31	2	847.396	1693.79	-1.18742	25.5563	6020	6020	MS2	0/0	3kptc_product_trypsin-2ul_2.raw
	High	GETAMTINGPWAWSNIDTSK	Unambiguous	1	1	3kptCTag-MBP		CID	1	0	1	1		339330	0.004	0.02529	2.25957	0	25.7393	42	2	1090.01	2179.01	0.199977	33.5575	10795	10795	MS2	0/0	3kptc_product_trypsin-2ul_2.raw
	High	GETAmTINGPWAWSNIDTSK	Unambiguous	1	1	3kptCTag-MBP	M5(Oxidation)	CID	1	0	1	1		1.11558e+07	0.005	0.04114	2.25943	0	9.26298	2	2	1098.01	2195.01	0.735533	30.4435	8892	8892	MS2	0/0	3kptc_product_trypsin-2ul_2.raw
	High	GQPSKPFVGVLSAGINAASPNKELAK	Unambiguous	1	1	3kptCTag-MBP		CID	1	0	1	1		978361	0	0.0003324	2.2588	1	63.2285	250	4	645.857	2580.4	-3.7294	31.5226	9613	9613	MS2	0/0	3kptc_product_trypsin-2ul_2.raw
	High	GQPSKPFVGVLSAGINAASPNKELAK	Unambiguous	1	1	3kptCTag-MBP		CID	1	0	1	1		9.83935e+06	0	2.018e-05	2.2434	1	15.3466	41	4	645.858	2580.41	-1.17484	29.3182	8179	8179	MS2	0/0	3kptc_product_trypsin-2ul_2.raw
	High	SALMFNLQEPYFTWPLIAADGGYAFK	Unambiguous	1	1	3kptCTag-MBP		CID	1	0	1	1			0.001	0.003161	2.24013	0	0	301	2	1475.73	2950.45	0.080248	44.4285	15451	15451	MS2	0/0	3kptc_product_trypsin-2ul_2.raw
	High	HmNADTDYSIAEAAFNKGETAmTINGPWAWSNIDTSK	Unambiguous	1	1	3kptCTag-MBP	M2(Oxidation); M22(Oxidation)	CID	1	0	1	1			0.001	0.01539	2.21196	1	55.0555	40	4	1023.21	4089.83	0.900193	37.1946	12846	12846	MS2	0/0	3kptc_product_trypsin-2ul_2.raw
	High	VTVEHPDKLEEKFPQVAATGDGPDIIFWAHDR	Unambiguous	1	1	3kptCTag-MBP		CID	1	0	1	1			0.001	0.01396	2.2114	2	6.56458	33	4	905.207	3617.8	0.576271	40.4011	14334	14334	MS2	0/0	3kptc_product_trypsin-2ul_2.raw
	High	LIAYPIAVEALSLIYNKDLLPNPPK	Unambiguous	1	1	3kptCTag-MBP		CID	1	0	1	1		1.66344e+06	0.004	0.03718	2.17984	1	15.6607	250	3	922.529	2765.57	-4.45121	36.1487	12230	12230	MS2	0/0	3kptc_product_trypsin-2ul_2.raw
	High	GQPSKPFVGVLSAGINAASPNK	Unambiguous	1	1	3kptCTag-MBP		CID	1	0	1	1			0.001	0.007497	2.17976	0	42.105	43	3	713.723	2139.16	0.00213687	37.2879	12900	12900	MS2	0/0	3kptc_product_trypsin-2ul_2.raw
	High	VNYGVTVLPTFK	Unambiguous	1	1	3kptCTag-MBP		CID	1	0	1	1		31858473	0.004	0.03034	2.16669	0	12.5793	250	2	669.377	1337.75	0.163207	29.9426	8603	8603	MS2	0/0	3kptc_product_trypsin-2ul_2.raw
	High	TWEEIPALDKELK	Unambiguous	1	1	3kptCTag-MBP		CID	1	0	1	1			0	0.0001194	2.15526	1	33.839	67	3	524.616	1571.83	0.509159	38.0288	13271	13271	MS2	0/0	3kptc_product_trypsin-2ul_2.raw
	High	HmNADTDYSIAEAAFNKGETAmTINGPWAWSNIDTSK	Unambiguous	1	1	3kptCTag-MBP	M2(Oxidation); M22(Oxidation)	CID	1	0	1	1		2.37243e+06	0.002	0.02073	2.15303	1	55.5549	42	4	1023.21	4089.83	1.19867	34.8353	11528	11528	MS2	0/0	3kptc_product_trypsin-2ul_2.raw
	High	SALmFNLQEPYFTWPLIAADGGYAFK	Unambiguous	1	1	3kptCTag-MBP	M4(Oxidation)	CID	1	0	1	1			0.002	0.02046	2.12146	0	0	42	3	989.485	2966.44	-0.905895	42.9065	15105	15105	MS2	0/0	3kptc_product_trypsin-2ul_2.raw
	High	TWEEIPALDKELK	Unambiguous	1	1	3kptCTag-MBP		CID	1	0	1	1		619192	0	0.0003965	2.11757	1	8.94146	42	3	524.615	1571.83	-0.422775	33.1116	10549	10549	MS2	0/0	3kptc_product_trypsin-2ul_2.raw
	High	GQPSKPFVGVLSAGINAASPNKELAK	Unambiguous	1	1	3kptCTag-MBP		CID	1	0	1	1		386891	0	4.934e-05	2.10828	1	80.1713	250	4	645.858	2580.41	-0.985614	36.1531	12231	12231	MS2	0/0	3kptc_product_trypsin-2ul_2.raw
	High	VNYGVTVLPTFK	Unambiguous	1	1	3kptCTag-MBP		CID	1	0	1	1			0	0.0003005	2.10353	0	22.4274	27	2	669.377	1337.75	0.436959	37.3713	12936	12936	MS2	0/0	3kptc_product_trypsin-2ul_2.raw
	High	HmNADTDYSIAEAAFNKGETAmTINGPWAWSNIDTSK	Unambiguous	1	1	3kptCTag-MBP	M2(Oxidation); M22(Oxidation)	CID	1	0	1	1		121823	0.001	0.003954	2.07356	1	19.3677	41	4	1023.21	4089.82	-0.472784	39.3784	13959	13959	MS2	0/0	3kptc_product_trypsin-2ul_2.raw
	High	GEIMPNIPQMSAFWYAVR	Unambiguous	1	1	3kptCTag-MBP		CID	1	0	1	1		1.32037e+06	0.005	0.04994	2.0689	0	0.384646	7	2	1055.52	2110.02	-1.05147	40.4741	14381	14381	MS2	0/0	3kptc_product_trypsin-2ul_2.raw
	High	TWEEIPALDKELK	Unambiguous	1	1	3kptCTag-MBP		CID	1	0	1	1			0	0.0003147	2.06801	1	21.9078	59	3	524.615	1571.83	-0.655759	36.9752	12717	12717	MS2	0/0	3kptc_product_trypsin-2ul_2.raw
	High	LVIWINGDK	Unambiguous	1	1	3kptCTag-MBP		CID	1	0	1	1		71548	0.001	0.005116	2.0662	0	77.3994	250	2	529.306	1057.61	0.982255	34.6819	11431	11431	MS2	0/0	3kptc_product_trypsin-2ul_2.raw
	High	SALmFNLQEPYFTWPLIAADGGYAFK	Unambiguous	1	1	3kptCTag-MBP	M4(Oxidation)	CID	1	0	1	1			0.001	0.01131	2.04928	0	0	288	2	1483.72	2966.44	-1.66265	41.576	14711	14711	MS2	0/0	3kptc_product_trypsin-2ul_2.raw
	High	GQPSKPFVGVLSAGINAASPNK	Unambiguous	1	1	3kptCTag-MBP		CID	1	0	1	1		673441	0.005	0.04526	2.0479	0	52.8566	43	3	713.724	2139.16	0.943704	25.4476	5941	5941	MS2	0/0	3kptc_product_trypsin-2ul_2.raw
	High	QTVDEALKDAQTNSSS	Unambiguous	1	1	3kptCTag-MBP		CID	1	0	1	1			0.004	0.03513	2.04634	1	76.4221	33	3	565.267	1693.79	-0.0782842	23.3389	4671	4671	MS2	0/0	3kptc_product_trypsin-2ul_2.raw
	High	HmNADTDYSIAEAAFNKGETAmTINGPWAWSNIDTSK	Unambiguous	1	1	3kptCTag-MBP	M2(Oxidation); M22(Oxidation)	CID	1	0	1	1			0.001	0.01637	2.04459	1	24.4379	40	4	1023.21	4089.82	-0.0549211	29.9911	8636	8636	MS2	0/0	3kptc_product_trypsin-2ul_2.raw
	High	LYPFTWDAVR	Unambiguous	1	1	3kptCTag-MBP		CID	1	0	1	1			0.001	0.006039	2.0433	0	6.44105	42	2	634.327	1267.65	-0.297603	34.8315	11524	11524	MS2	0/0	3kptc_product_trypsin-2ul_2.raw
	High	FGGYAQSGLLAEITPDK	Unambiguous	1	1	3kptCTag-MBP		CID	1	0	1	1			0.001	0.005276	2.03633	0	7.18118	12	2	883.952	1766.9	0.289023	39.6575	14083	14083	MS2	0/0	3kptc_product_trypsin-2ul_2.raw
	High	EFLENYLLTDEGLEAVNK	Unambiguous	1	1	3kptCTag-MBP		CID	1	0	1	1			0	0.001021	2.03165	0	15.0577	50	3	699.685	2097.04	0.639909	40.4634	14377	14377	MS2	0/0	3kptc_product_trypsin-2ul_2.raw
	High	GSHHHHHHGSTVK	Unambiguous	1	1	3kptCTag-MBP		CID	1	0	1	1			0.001	0.01496	2.00832	0	1.18573	11	4	365.177	1457.69	-2.77691	24.881	5588	5588	MS2	0/0	3kptc_product_trypsin-2ul_2.raw
	High	GEImPNIPQMSAFWYAVR	Unambiguous	1	1	3kptCTag-MBP	M4(Oxidation)	CID	1	0	1	1			0.001	0.01114	1.99867	0	7.27571	32	2	1063.51	2126.02	-0.374283	39.2704	13893	13893	MS2	0/0	3kptc_product_trypsin-2ul_2.raw
	High	FGGYAQSGLLAEITPDKAFQDKLYPFTWDAVR	Unambiguous	1	1	3kptCTag-MBP		CID	1	0	1	1			0	5.543e-06	1.99074	2	4.3472	42	4	901.958	3604.81	-0.0203527	40.8885	14504	14504	MS2	0/0	3kptc_product_trypsin-2ul_2.raw
	High	AFQDKLYPFTWDAVR	Unambiguous	1	1	3kptCTag-MBP		CID	1	0	1	1		610684	0	0.0006361	1.98827	1	28.815	41	3	619.649	1856.93	-0.45624	35.3431	11858	11858	MS2	0/0	3kptc_product_trypsin-2ul_2.raw
	High	VTVEHPDKLEEK	Unambiguous	1	1	3kptCTag-MBP		CID	1	0	1	1			0.005	0.0418	1.94278	1	4.84856	30	3	475.252	1423.74	-0.0856082	19.8107	2719	2719	MS2	0/0	3kptc_product_trypsin-2ul_2.raw
	High	NKHmNADTDYSIAEAAFNKGETAmTINGPWAWSNIDTSK	Unambiguous	1	1	3kptCTag-MBP	M4(Oxidation); M24(Oxidation)	CID	1	0	1	1		9.05328e+06	0.001	0.004781	1.93873	2	84.5397	42	4	1083.74	4331.96	-0.775398	30.4448	8894	8894	MS2	0/0	3kptc_product_trypsin-2ul_2.raw
	High	LIAYPIAVEALSLIYNK	Unambiguous	1	1	3kptCTag-MBP		CID	1	0	1	1			0	0.0003528	1.9333	0	5.11633	32	3	631.036	1891.09	0.121675	43.3781	15218	15218	MS2	0/0	3kptc_product_trypsin-2ul_2.raw
	High	GSHHHHHHGSTVK	Unambiguous	1	1	3kptCTag-MBP		CID	1	0	1	1		45753.9	0.001	0.003148	1.92431	0	31.3041	250	3	486.568	1457.69	-0.150729	28.6221	7837	7837	MS2	0/0	3kptc_product_trypsin-2ul_2.raw
	High	FGGYAQSGLLAEITPDKAFQDK	Unambiguous	1	1	3kptCTag-MBP		CID	1	0	1	1		3.37674e+06	0.002	0.01875	1.91252	1	17.5624	39	3	786.065	2356.18	-0.215855	33.5475	10786	10786	MS2	0/0	3kptc_product_trypsin-2ul_2.raw
	High	QTVDEALKDAQTNSSS	Unambiguous	1	1	3kptCTag-MBP		CID	1	0	1	1		1.3253e+06	0.001	0.003959	1.90893	1	49.4989	43	2	847.398	1693.79	0.542244	27.3277	7032	7032	MS2	0/0	3kptc_product_trypsin-2ul_2.raw
	High	TWEEIPALDKELK	Unambiguous	1	1	3kptCTag-MBP		CID	1	0	1	1			0.001	0.01214	1.90873	1	61.4459	36	3	524.617	1571.84	2.606	35.9533	12147	12147	MS2	0/0	3kptc_product_trypsin-2ul_2.raw
	High	GQPSKPFVGVLSAGINAASPNKELAK	Unambiguous	1	1	3kptCTag-MBP		CID	1	0	1	1		328966	0	0.0005047	1.90711	1	20.2139	250	4	645.859	2580.41	-0.512548	34.062	11081	11081	MS2	0/0	3kptc_product_trypsin-2ul_2.raw
	High	GQPSKPFVGVLSAGINAASPNK	Unambiguous	1	1	3kptCTag-MBP		CID	1	0	1	1		433726	0.002	0.02161	1.88924	0	26.284	42	3	713.723	2139.15	-0.597043	38.0499	13283	13283	MS2	0/0	3kptc_product_trypsin-2ul_2.raw
	High	SALMFNLQEPYFTWPLIAADGGYAFK	Unambiguous	1	1	3kptCTag-MBP		CID	1	0	1	1		66224.4	0.004	0.03985	1.87351	0	13.6961	250	2	1475.73	2950.45	0.742223	42.374	14963	14963	MS2	0/0	3kptc_product_trypsin-2ul_2.raw
	High	SALmFNLQEPYFTWPLIAADGGYAFK	Unambiguous	1	1	3kptCTag-MBP	M4(Oxidation)	CID	1	0	1	1			0.001	0.01051	1.85924	0	14.242	42	3	989.487	2966.45	1.0076	40.8322	14486	14486	MS2	0/0	3kptc_product_trypsin-2ul_2.raw
	High	FGGYAQSGLLAEITPDK	Unambiguous	1	1	3kptCTag-MBP		CID	1	0	1	1			0.001	0.008768	1.85415	0	6.59695	14	2	883.951	1766.9	-0.263676	42.6851	15042	15042	MS2	0/0	3kptc_product_trypsin-2ul_2.raw
	High	AGLTFLVDLIKNK	Unambiguous	1	1	3kptCTag-MBP		CID	1	0	1	1		851988	0	0.0005758	1.85402	1	0	59	3	477.957	1431.86	-0.10098	33.3047	10659	10659	MS2	0/0	3kptc_product_trypsin-2ul_2.raw
	High	GQPSKPFVGVLSAGINAASPNKELAK	Unambiguous	1	1	3kptCTag-MBP		CID	1	0	1	1			0	0.002268	1.84723	1	13.46	85	4	645.859	2580.41	-0.0394832	35.0715	11681	11681	MS2	0/0	3kptc_product_trypsin-2ul_2.raw
	High	AGLTFLVDLIK	Unambiguous	1	1	3kptCTag-MBP		CID	1	0	1	1			0.001	0.00531	1.84335	0	32.4869	9	2	595.363	1189.72	0.215723	43.9131	15326	15326	MS2	0/0	3kptc_product_trypsin-2ul_2.raw
	High	GSHHHHHHGSTVK	Unambiguous	1	1	3kptCTag-MBP		CID	1	0	1	1			0.001	0.006357	1.84197	0	68.6544	192	3	486.568	1457.69	0.288918	32.0982	9987	9987	MS2	0/0	3kptc_product_trypsin-2ul_2.raw
	High	SALmFNLQEPYFTWPLIAADGGYAFK	Unambiguous	1	1	3kptCTag-MBP	M4(Oxidation)	CID	1	0	1	1			0.009	0.08734	1.83401	0	0	110	2	1483.73	2966.44	-0.18123	40.0597	14237	14237	MS2	0/0	3kptc_product_trypsin-2ul_2.raw
	High	TWEEIPALDKELK	Unambiguous	1	1	3kptCTag-MBP		CID	1	0	1	1			0.008	0.08144	1.83389	1	54.2152	54	3	524.615	1571.83	-0.655759	43.4252	15228	15228	MS2	0/0	3kptc_product_trypsin-2ul_2.raw
	High	LIAYPIAVEALSLIYNKDLLPNPPK	Unambiguous	1	1	3kptCTag-MBP		CID	1	0	1	1			0.005	0.04023	1.82332	1	24.0818	41	4	692.152	2765.59	0.288899	42.8964	15101	15101	MS2	0/0	3kptc_product_trypsin-2ul_2.raw
	High	FPQVAATGDGPDIIFWAHDR	Unambiguous	1	1	3kptCTag-MBP		CID	1	0	1	1			0	9.782e-05	1.81904	0	17.2836	42	3	738.364	2213.08	-0.02419	40.8865	14502	14502	MS2	0/0	3kptc_product_trypsin-2ul_2.raw
	High	TWEEIPALDK	Unambiguous	1	1	3kptCTag-MBP		CID	1	0	1	1			0.006	0.05395	1.80933	0	32.984	55	2	601.309	1201.61	0.441018	42.1478	14902	14902	MS2	0/0	3kptc_product_trypsin-2ul_2.raw
	High	IAATMENAQK	Unambiguous	1	1	3kptCTag-MBP		CID	1	0	1	1		1.9363e+06	0	0.002117	1.80278	0	57.1618	29	2	538.774	1076.54	0.153931	17.828	1997	1997	MS2	0/0	3kptc_product_trypsin-2ul_2.raw
	High	SALMFNLQEPYFTWPLIAADGGYAFK	Unambiguous	1	1	3kptCTag-MBP		CID	1	0	1	1			0.009	0.08565	1.79344	0	0	86	2	1475.73	2950.44	-1.4092	41.1948	14601	14601	MS2	0/0	3kptc_product_trypsin-2ul_2.raw
	High	VNYGVTVLPTFK	Unambiguous	1	1	3kptCTag-MBP		CID	1	0	1	1			0.001	0.01279	1.78792	0	28.144	44	2	669.377	1337.75	0.163207	42.4284	14979	14979	MS2	0/0	3kptc_product_trypsin-2ul_2.raw
	High	HMNADTDYSIAEAAFNK	Unambiguous	1	1	3kptCTag-MBP		CID	1	0	1	1			0.002	0.01729	1.78766	0	14.8407	250	3	633.284	1897.84	-0.410253	22.2676	3956	3956	MS2	0/0	3kptc_product_trypsin-2ul_2.raw
	High	AFQDKLYPFTWDAVR	Unambiguous	1	1	3kptCTag-MBP		CID	1	0	1	1		1.43611e+06	0.002	0.01832	1.7806	1	38.787	65	4	464.988	1856.93	-0.562087	28.1126	7504	7504	MS2	0/0	3kptc_product_trypsin-2ul_2.raw
	High	GQPSKPFVGVLSAGINAASPNKELAK	Unambiguous	1	1	3kptCTag-MBP		CID	1	0	1	1		141061	0.001	0.004183	1.77517	1	28.8147	70	4	645.86	2580.42	1.09587	38.5573	13557	13557	MS2	0/0	3kptc_product_trypsin-2ul_2.raw
	High	VTVEHPDKLEEKFPQVAATGDGPDIIFWAHDR	Unambiguous	1	1	3kptCTag-MBP		CID	1	0	1	1		1.41937e+07	0.001	0.01265	1.75639	2	64.3054	42	6	603.806	3617.8	-1.15198	30.1983	8757	8757	MS2	0/0	3kptc_product_trypsin-2ul_2.raw
	High	AGLTFLVDLIK	Unambiguous	1	1	3kptCTag-MBP		CID	1	0	1	1			0.001	0.005835	1.75615	0	19.7585	21	2	595.363	1189.72	0.113119	39.8577	14171	14171	MS2	0/0	3kptc_product_trypsin-2ul_2.raw
	High	GQPSKPFVGVLSAGINAASPNK	Unambiguous	1	1	3kptCTag-MBP		CID	1	0	1	1			0.001	0.006076	1.75291	0	23.5085	41	2	1070.08	2139.16	-0.219836	25.885	6237	6237	MS2	0/0	3kptc_product_trypsin-2ul_2.raw
	High	LIAYPIAVEALSLIYNK	Unambiguous	1	1	3kptCTag-MBP		CID	1	0	1	1			0	0.001594	1.73113	0	2.46488	13	2	946.05	1891.09	-0.355341	42.7953	15072	15072	MS2	0/0	3kptc_product_trypsin-2ul_2.raw
	High	GEIMPNIPQmSAFWYAVR	Unambiguous	1	1	3kptCTag-MBP	M10(Oxidation)	CID	1	0	1	1			0.005	0.04134	1.71469	0	8.34144	67	2	1063.52	2126.02	1.80757	44.3576	15432	15432	MS2	0/0	3kptc_product_trypsin-2ul_2.raw
	High	TWEEIPALDK	Unambiguous	1	1	3kptCTag-MBP		CID	1	0	1	1		74130.3	0.006	0.05231	1.71212	0	37.4595	92	2	601.31	1201.61	1.76167	37.9121	13215	13215	MS2	0/0	3kptc_product_trypsin-2ul_2.raw
	High	AFQDKLYPFTWDAVR	Unambiguous	1	1	3kptCTag-MBP		CID	1	0	1	1			0.001	0.01547	1.70451	1	43.467	50	3	619.649	1856.93	-0.061814	40.5608	14414	14414	MS2	0/0	3kptc_product_trypsin-2ul_2.raw
	High	DTGIKVTVEHPDKLEEK	Unambiguous	1	1	3kptCTag-MBP		CID	1	0	1	1			0	0.000716	1.7012	2	0	93	2	969.513	1938.02	0.655999	21.2483	3437	3437	MS2	0/0	3kptc_product_trypsin-2ul_2.raw
	High	GEImPNIPQMSAFWYAVR	Unambiguous	1	1	3kptCTag-MBP	M4(Oxidation)	CID	1	0	1	1		2.37582e+06	0.002	0.01973	1.66332	0	46.0164	42	3	709.344	2126.02	-0.811238	29.9767	8627	8627	MS2	0/0	3kptc_product_trypsin-2ul_2.raw
	High	DKPLGAVALK	Unambiguous	1	1	3kptCTag-MBP		CID	1	0	1	1		145708	0.004	0.02845	1.57709	0	48.2166	250	2	506.313	1011.62	-0.395377	35.3685	11880	11880	MS2	0/0	3kptc_product_trypsin-2ul_2.raw
	High	GSHHHHHHGSTVK	Unambiguous	1	1	3kptCTag-MBP		CID	1	0	1	1			0.006	0.06277	1.55873	0	25.12	26	3	486.568	1457.69	0.477338	23.9243	4997	4997	MS2	0/0	3kptc_product_trypsin-2ul_2.raw
	High	GQPSKPFVGVLSAGINAASPNKELAK	Unambiguous	1	1	3kptCTag-MBP		CID	1	0	1	1		388537	0.001	0.009164	1.54575	1	43.8455	33	4	645.858	2580.41	-1.83713	32.6044	10276	10276	MS2	0/0	3kptc_product_trypsin-2ul_2.raw
	High	VNYGVTVLPTFK	Unambiguous	1	1	3kptCTag-MBP		CID	1	0	1	1			0.004	0.02611	1.52086	0	41.0635	44	2	669.377	1337.75	-0.201796	44.4455	15456	15456	MS2	0/0	3kptc_product_trypsin-2ul_2.raw
	High	SYEEELAKDPR	Unambiguous	1	1	3kptCTag-MBP		CID	1	0	1	1		4764626384	0.001	0.002463	1.51756	1	22.5221	31	2	668.823	1336.64	0.179475	20.215	2939	2939	MS2	0/0	3kptc_product_trypsin-2ul_2.raw
	High	EFLENYLLTDEGLEAVNK	Unambiguous	1	1	3kptCTag-MBP		CID	1	0	1	1		1.19335e+07	0	0.0007561	1.51635	0	14.2362	42	3	699.684	2097.04	-0.582518	30.9722	9234	9234	MS2	0/0	3kptc_product_trypsin-2ul_2.raw
	High	AFQDKLYPFTWDAVR	Unambiguous	1	1	3kptCTag-MBP		CID	1	0	1	1			0.009	0.08699	1.50007	1	10.6974	42	3	619.649	1856.93	0.0367924	37.4685	12986	12986	MS2	0/0	3kptc_product_trypsin-2ul_2.raw
	High	GSHHHHHHGSTVK	Unambiguous	1	1	3kptCTag-MBP		CID	1	0	1	1			0	0.0007457	1.44454	0	29.6859	83	4	365.178	1457.69	0.070338	34.511	11349	11349	MS2	0/0	3kptc_product_trypsin-2ul_2.raw
	High	GEIMPNIPQmSAFWYAVR	Unambiguous	1	1	3kptCTag-MBP	M10(Oxidation)	CID	1	0	1	1			0.007	0.06623	1.4163	0	15.4058	41	3	709.345	2126.02	0.652903	33.5555	10793	10793	MS2	0/0	3kptc_product_trypsin-2ul_2.raw
	High	FGGYAQSGLLAEITPDK	Unambiguous	1	1	3kptCTag-MBP		CID	1	0	1	1			0.001	0.0135	1.41164	0	5.51746	20	2	883.952	1766.9	0.0817608	44.6969	15507	15507	MS2	0/0	3kptc_product_trypsin-2ul_2.raw
	High	SALmFNLQEPYFTWPLIAADGGYAFK	Unambiguous	1	1	3kptCTag-MBP	M4(Oxidation)	CID	1	0	1	1		13274.6	0.001	0.007046	1.35091	0	0	249	2	1483.73	2966.44	-0.18123	42.595	15013	15013	MS2	0/0	3kptc_product_trypsin-2ul_2.raw
	High	LYPFTWDAVR	Unambiguous	1	1	3kptCTag-MBP		CID	1	0	1	1			0.004	0.02814	1.34959	0	5.80395	43	2	634.328	1267.65	0.569067	36.9695	12711	12711	MS2	0/0	3kptc_product_trypsin-2ul_2.raw
	High	LIAYPIAVEALSLIYNK	Unambiguous	1	1	3kptCTag-MBP		CID	1	0	1	1			0.004	0.03864	1.326	0	1.53124	14	2	946.051	1891.09	0.0965101	41.7836	14784	14784	MS2	0/0	3kptc_product_trypsin-2ul_2.raw
	High	EFLENYLLTDEGLEAVNKDKPLGAVALK	Unambiguous	1	1	3kptCTag-MBP		CID	1	0	1	1		9.7155e+06	0.002	0.01786	1.29969	1	0.75837	250	4	773.166	3089.64	0.27152	36.5091	12409	12409	MS2	0/0	3kptc_product_trypsin-2ul_2.raw
	High	FPQVAATGDGPDIIFWAHDR	Unambiguous	1	1	3kptCTag-MBP		CID	1	0	1	1			0.007	0.06632	1.27517	0	17.2682	22	3	738.364	2213.08	-0.106928	39.753	14133	14133	MS2	0/0	3kptc_product_trypsin-2ul_2.raw
	High	EFLENYLLTDEGLEAVNKDKPLGAVALK	Unambiguous	1	1	3kptCTag-MBP		CID	1	0	1	1		3.14415e+06	0.001	0.00437	1.26964	1	21.443	250	2	1545.32	3089.64	0.398752	31.8329	9815	9815	MS2	0/0	3kptc_product_trypsin-2ul_2.raw
	High	TWEEIPALDK	Unambiguous	1	1	3kptCTag-MBP		CID	1	0	1	1			0.004	0.02586	1.2616	0	45.7139	40	2	601.309	1201.61	0.542607	36.8941	12667	12667	MS2	0/0	3kptc_product_trypsin-2ul_2.raw
	High	SALmFNLQEPYFTWPLIAADGGYAFK	Unambiguous	1	1	3kptCTag-MBP	M4(Oxidation)	CID	1	0	1	1		973126	0.005	0.04157	1.25029	0	0	109	2	1483.72	2966.44	-0.592734	38.04	13278	13278	MS2	0/0	3kptc_product_trypsin-2ul_2.raw
	High	LYPFTWDAVR	Unambiguous	1	1	3kptCTag-MBP		CID	1	0	1	1			0.006	0.05342	1.23301	0	8.06826	36	2	634.327	1267.65	0.0875838	40.0381	14230	14230	MS2	0/0	3kptc_product_trypsin-2ul_2.raw
	High	EFLENYLLTDEGLEAVNK	Unambiguous	1	1	3kptCTag-MBP		CID	1	0	1	1			0.008	0.07991	1.2114	0	49.9649	38	2	1049.02	2097.04	1.22843	45.1762	15610	15610	MS2	0/0	3kptc_product_trypsin-2ul_2.raw
	High	AGLTFLVDLIK	Unambiguous	1	1	3kptCTag-MBP		CID	1	0	1	1			0.003	0.02341	1.20421	0	55.3442	20	2	595.363	1189.72	-0.0920895	44.9171	15558	15558	MS2	0/0	3kptc_product_trypsin-2ul_2.raw
	High	EFLENYLLTDEGLEAVNKDKPLGAVALK	Unambiguous	1	1	3kptCTag-MBP		CID	1	0	1	1		2.32689e+06	0.001	0.009113	1.04274	1	11.812	42	4	773.166	3089.64	0.27152	35.4516	11930	11930	MS2	0/0	3kptc_product_trypsin-2ul_2.raw
	High	AGLTFLVDLIK	Unambiguous	1	1	3kptCTag-MBP		CID	1	0	1	1		2513905	0.005	0.05119	1.03295	0	21.9035	42	2	595.363	1189.72	0.0105148	31.2687	9437	9437	MS2	0/0	3kptc_product_trypsin-2ul_2.raw
	High	GEIMPNIPQMSAFWYAVR	Unambiguous	1	1	3kptCTag-MBP		CID	1	0	1	1			0.008	0.0816	1.00773	0	4.94426	18	3	704.014	2110.03	0.706662	39.7371	14121	14121	MS2	0/0	3kptc_product_trypsin-2ul_2.raw
	High	DLLPNPPKTWEEIPALDKELK	Unambiguous	1	1	3kptCTag-MBP		CID	1	0	1	1		227450689	0.004	0.03	0.982523	2	2.82781	13	4	612.333	2446.31	-4.40533	30.6641	9006	9006	MS2	0/0	3kptc_product_trypsin-2ul_2.raw
	High	GEIMPNIPQMSAFWYAVR	Unambiguous	1	1	3kptCTag-MBP		CID	1	0	1	1			0	0.001664	0.951587	0	5.97592	40	2	1055.52	2110.02	-0.472942	43.5022	15241	15241	MS2	0/0	3kptc_product_trypsin-2ul_2.raw
	High	LYPFTWDAVR	Unambiguous	1	1	3kptCTag-MBP		CID	1	0	1	1		1.768e+06	0.006	0.05889	0.941485	0	1.24356	43	3	423.22	1267.65	-0.380433	27.4518	7109	7109	MS2	0/0	3kptc_product_trypsin-2ul_2.raw
	High	DLLPNPPKTWEEIPALDKELK	Unambiguous	1	1	3kptCTag-MBP		CID	1	0	1	1			0.001	0.01435	0.878014	2	14.8301	41	4	612.336	2446.32	-0.612945	30.3928	8865	8865	MS2	0/0	3kptc_product_trypsin-2ul_2.raw
	High	GSHHHHHHGSTVK	Unambiguous	1	1	3kptCTag-MBP		CID	1	0	1	1		4848.68	0.006	0.05994	0.874836	0	0	119	3	486.568	1457.69	0.477338	15.8301	1624	1624	MS2	0/0	3kptc_product_trypsin-2ul_2.raw
	High	FPQVAATGDGPDIIFWAHDR	Unambiguous	1	1	3kptCTag-MBP		CID	1	0	1	1		77664.5	0.006	0.05862	0.747931	0	13.2175	55	3	738.365	2213.08	1.13414	45.2103	15617	15617	MS2	0/0	3kptc_product_trypsin-2ul_2.raw
	High	SALmFNLQEPYFTWPLIAADGGYAFK	Unambiguous	1	1	3kptCTag-MBP	M4(Oxidation)	CID	1	0	1	1		41715.3	0.001	0.01341	0.556203	0	0	248	2	1483.73	2966.45	0.88868	43.6358	15268	15268	MS2	0/0	3kptc_product_trypsin-2ul_2.raw
3kptCCatcher	3kptCCatcher	83.9456	88.46	1	12	12	43	9.90879e+08	104	11.4849	8.36768
	Confidence Level	Sequence	PSM Ambiguity	# Proteins	# Protein Groups	Protein Group Accessions	Modifications	Activation Type	ΔScore	ΔCn	Rank	Search Engine Rank	QuanResultID	Precursor Area	q-Value	PEP	XCorr	# Missed Cleavages	Isolation Interference [%]	Ion Inject Time [ms]	Charge	m/z [Da]	MH+ [Da]	ΔM [ppm]	RT [min]	First Scan	Last Scan	MS Order	Ions Matched	Spectrum File
	High	WSNIPYGDYQIFETK	Unambiguous	1	1	3kptCCatcher		CID	1	0	1	1			0	5.09e-05	3.82757	0	0	41	2	930.942	1860.88	-1.72956	32.6515	10317	10317	MS2	0/0	3kptc_product_trypsin-2ul_2.raw
	High	LKGAEFVLK	Unambiguous	1	1	3kptCCatcher		CID	1	0	1	1			0	3.131e-05	3.64035	1	0	250	3	335.543	1004.61	-0.420335	26.2184	6380	6380	MS2	0/0	3kptc_product_trypsin-2ul_2.raw
	High	LKGAEFVLK	Unambiguous	1	1	3kptCCatcher		CID	1	0	1	1			0	1.694e-05	3.4512	1	28.5638	250	3	335.542	1004.61	-1.33166	27.9091	7377	7377	MS2	0/0	3kptc_product_trypsin-2ul_2.raw
	High	LKGAEFVLK	Unambiguous	1	1	3kptCCatcher		CID	1	0	1	1			0	0.0001844	3.4296	1	5.8748	136	3	335.543	1004.61	-0.875997	25.1913	5775	5775	MS2	0/0	3kptc_product_trypsin-2ul_2.raw
	High	DNNGKIVVVAGK	Unambiguous	1	1	3kptCCatcher		CID	1	0	1	1		3.65167e+06	0	0.0001269	3.30321	1	11.2068	47	3	405.235	1213.69	0.271858	19.3027	2499	2499	MS2	0/0	3kptc_product_trypsin-2ul_2.raw
	High	LKGAEFVLK	Unambiguous	1	1	3kptCCatcher		CID	1	0	1	1			0	2.065e-05	3.2616	1	19.5384	183	3	335.543	1004.61	-0.238071	23.1624	4569	4569	MS2	0/0	3kptc_product_trypsin-2ul_2.raw
	High	EVTGVSDENGVIK	Unambiguous	1	1	3kptCCatcher		CID	1	0	1	1		3.15169e+06	0	7.462e-06	3.21188	0	35.5121	32	3	449.563	1346.67	-4.19018	20.8951	3219	3219	MS2	0/0	3kptc_product_trypsin-2ul_2.raw
	High	TSYQLLKDPIDVK	Unambiguous	1	1	3kptCCatcher		CID	1	0	1	1		11020852	0	0.0001193	3.01364	1	63.7843	43	3	507.283	1519.83	-2.09995	26.6911	6661	6661	MS2	0/0	3kptc_product_trypsin-2ul_2.raw
	High	IVVVAGKEVTGVSDENGVIK	Unambiguous	1	1	3kptCCatcher		CID	1	0	1	1		3.95282e+06	0	1.519e-05	2.98198	1	48.8378	44	2	1007.06	2013.12	-2.92701	24.6903	5458	5458	MS2	0/0	3kptc_product_trypsin-2ul_2.raw
	High	EVTGVSDENGVIK	Unambiguous	1	1	3kptCCatcher		CID	1	0	1	1			0.001	0.0072	2.91115	0	77.4449	37	2	673.845	1346.68	1.53048	25.8673	6225	6225	MS2	0/0	3kptc_product_trypsin-2ul_2.raw
	High	EVTGVSDENGVIK	Unambiguous	1	1	3kptCCatcher		CID	1	0	1	1		1.55713e+07	0	0.0003034	2.89014	0	8.72603	28	2	673.844	1346.68	0.170798	21.7984	3676	3676	MS2	0/0	3kptc_product_trypsin-2ul_2.raw
	High	TSYQLLKDPIDVK	Unambiguous	1	1	3kptCCatcher		CID	1	0	1	1		257381	0	1.586e-05	2.87265	1	28.4122	250	3	507.284	1519.84	0.128882	35.5105	11964	11964	MS2	0/0	3kptc_product_trypsin-2ul_2.raw
	High	TSYQLLKDPIDVK	Unambiguous	1	1	3kptCCatcher		CID	1	0	1	1		755904	0	1.744e-05	2.67536	1	13.8351	250	3	507.284	1519.84	0.0686435	32.3422	10136	10136	MS2	0/0	3kptc_product_trypsin-2ul_2.raw
	High	TSYQLLKDPIDVK	Unambiguous	1	1	3kptCCatcher		CID	1	0	1	1			0	8.248e-07	2.64035	1	69.2064	40	3	507.284	1519.84	0.128882	27.6438	7224	7224	MS2	0/0	3kptc_product_trypsin-2ul_2.raw
	High	EVTGVSDENGVIK	Unambiguous	1	1	3kptCCatcher		CID	1	0	1	1		233794	0	0.001934	2.61733	0	48.4614	40	2	673.843	1346.68	-0.735657	29.6296	8384	8384	MS2	0/0	3kptc_product_trypsin-2ul_2.raw
	High	TSYQLLKDPIDVK	Unambiguous	1	1	3kptCCatcher		CID	1	0	1	1		1.94706e+06	0	3.851e-05	2.58648	1	8.03358	43	3	507.284	1519.84	0.490313	29.6669	8417	8417	MS2	0/0	3kptc_product_trypsin-2ul_2.raw
	High	TSYQLLKDPIDVK	Unambiguous	1	1	3kptCCatcher		CID	1	0	1	1			0.001	0.005552	2.46069	1	45.2102	40	3	507.285	1519.84	2.05651	30.813	9128	9128	MS2	0/0	3kptc_product_trypsin-2ul_2.raw
	High	TSYQLLKDPIDVK	Unambiguous	1	1	3kptCCatcher		CID	1	0	1	1			0	8.385e-06	2.43497	1	32.1068	36	3	507.284	1519.84	0.851744	28.6635	7861	7861	MS2	0/0	3kptc_product_trypsin-2ul_2.raw
	High	GAEFVLK	Unambiguous	1	1	3kptCCatcher		CID	1	0	1	1			0	0.001964	2.4221	0	3.5964	250	2	382.221	763.435	-0.224405	26.2829	6397	6397	MS2	0/0	3kptc_product_trypsin-2ul_2.raw
	High	GAEFVLK	Unambiguous	1	1	3kptCCatcher		CID	1	0	1	1		2.64e+09	0	0.000464	2.38871	0	4.99448	31	2	382.221	763.435	-0.144457	23.2488	4620	4620	MS2	0/0	3kptc_product_trypsin-2ul_2.raw
	High	TSYQLLKDPIDVK	Unambiguous	1	1	3kptCCatcher		CID	1	0	1	1			0	0.001067	2.31566	1	59.9838	41	3	507.284	1519.84	-0.292788	31.2986	9461	9461	MS2	0/0	3kptc_product_trypsin-2ul_2.raw
	High	TSYQLLKDPIDVK	Unambiguous	1	1	3kptCCatcher		CID	1	0	1	1		375841	0	0.002197	2.30657	1	20.0538	98	3	507.284	1519.84	1.0927	33.3782	10697	10697	MS2	0/0	3kptc_product_trypsin-2ul_2.raw
	High	GAEFVLKDNNGK	Unambiguous	1	1	3kptCCatcher		CID	1	0	1	1			0.001	0.009502	2.21844	1	9.91549	63	2	646.336	1291.66	-0.134146	20.1832	2925	2925	MS2	0/0	3kptc_product_trypsin-2ul_2.raw
	High	TSYQLLK	Unambiguous	1	1	3kptCCatcher		CID	1	0	1	1		3.17061e+08	0.001	0.007848	2.19114	0	0	40	2	426.745	852.482	-0.823687	22.4286	4065	4065	MS2	0/0	3kptc_product_trypsin-2ul_2.raw
	High	GAEFVLK	Unambiguous	1	1	3kptCCatcher		CID	1	0	1	1			0.001	0.009205	2.19053	0	0	250	2	382.221	763.435	0.175336	27.4633	7117	7117	MS2	0/0	3kptc_product_trypsin-2ul_2.raw
	High	GAEFVLK	Unambiguous	1	1	3kptCCatcher		CID	1	0	1	1			0	0.000553	2.17709	0	0	250	2	382.221	763.434	-0.624146	29.7891	8503	8503	MS2	0/0	3kptc_product_trypsin-2ul_2.raw
	High	WSNIPYGDYQIFETKAPTYTKEDGTK	Unambiguous	1	1	3kptCCatcher		CID	1	0	1	1		1.7203e+06	0.001	0.01612	2.17419	2	37.2762	41	4	763.871	3052.46	0.996146	27.9071	7375	7375	MS2	0/0	3kptc_product_trypsin-2ul_2.raw
	High	GAEFVLK	Unambiguous	1	1	3kptCCatcher		CID	1	0	1	1			0.001	0.01435	2.05138	0	0	14	2	382.221	763.435	-0.304353	25.2747	5836	5836	MS2	0/0	3kptc_product_trypsin-2ul_2.raw
	High	TSYQLLK	Unambiguous	1	1	3kptCCatcher		CID	1	0	1	1			0.001	0.003698	2.01749	0	0	42	2	426.745	852.483	0.393462	23.4401	4714	4714	MS2	0/0	3kptc_product_trypsin-2ul_2.raw
	High	TSYQLLKDPIDVK	Unambiguous	1	1	3kptCCatcher		CID	1	0	1	1			0.002	0.01734	2.01514	1	36.6031	87	3	507.284	1519.84	-0.473504	34.4666	11327	11327	MS2	0/0	3kptc_product_trypsin-2ul_2.raw
	High	EVTGVSDENGVIK	Unambiguous	1	1	3kptCCatcher		CID	1	0	1	1		296392	0.005	0.04776	1.94067	0	81.9172	40	2	673.844	1346.68	-0.0104932	29.7394	8470	8470	MS2	0/0	3kptc_product_trypsin-2ul_2.raw
	High	GSHHHHHHGSTTGIIELTK	Unambiguous	1	1	3kptCCatcher		CID	1	0	1	1		1.66606e+06	0	0.000218	1.85115	0	70.4822	30	4	522.264	2086.03	0.36174	28.4234	7710	7710	MS2	0/0	3kptc_product_trypsin-2ul_2.raw
	High	TSYQLLKDPIDVK	Unambiguous	1	1	3kptCCatcher		CID	1	0	1	1		222704	0	0.001484	1.81244	1	30.7983	250	3	507.284	1519.84	0.249359	36.5885	12457	12457	MS2	0/0	3kptc_product_trypsin-2ul_2.raw
	High	WSNIPYGDYQIFETK	Unambiguous	1	1	3kptCCatcher		CID	1	0	1	1			0.004	0.03867	1.77845	0	9.71465	32	2	930.943	1860.88	-0.679991	42.0628	14873	14873	MS2	0/0	3kptc_product_trypsin-2ul_2.raw
	High	LKGAEFVLK	Unambiguous	1	1	3kptCCatcher		CID	1	0	1	1		2.08376e+06	0.001	0.008271	1.7332	1	0.870619	10	3	335.542	1004.61	-1.69619	24.1678	5162	5162	MS2	0/0	3kptc_product_trypsin-2ul_2.raw
	High	GSHHHHHHGSTTGIIELTK	Unambiguous	1	1	3kptCCatcher		CID	1	0	1	1			0.007	0.06814	1.73162	0	9.97967	89	5	418.012	2086.03	0.121222	28.0304	7457	7457	MS2	0/0	3kptc_product_trypsin-2ul_2.raw
	High	GAEFVLKDNNGK	Unambiguous	1	1	3kptCCatcher		CID	1	0	1	1			0.004	0.03184	1.72209	1	0	63	2	646.335	1291.66	-1.36273	20.1095	2891	2891	MS2	0/0	3kptc_product_trypsin-2ul_2.raw
	High	TSYQLLKDPIDVK	Unambiguous	1	1	3kptCCatcher		CID	1	0	1	1			0.005	0.04158	1.69678	1	36.0497	34	3	507.283	1519.83	-1.37708	38.8175	13682	13682	MS2	0/0	3kptc_product_trypsin-2ul_2.raw
	High	TSYQLLKDPIDVK	Unambiguous	1	1	3kptCCatcher		CID	1	0	1	1		162222	0.004	0.02683	1.52114	1	74.0364	59	2	760.422	1519.84	0.49916	25.2444	5817	5817	MS2	0/0	3kptc_product_trypsin-2ul_2.raw
	High	TSYQLLKDPIDVK	Unambiguous	1	1	3kptCCatcher		CID	1	0	1	1		83220.4	0.006	0.05731	1.49194	1	63.5764	54	2	760.423	1519.84	1.78425	34.0724	11084	11084	MS2	0/0	3kptc_product_trypsin-2ul_2.raw
	High	GAEFVLK	Unambiguous	1	1	3kptCCatcher		CID	1	0	1	1			0.003	0.02248	1.4465	0	0	112	2	382.221	763.435	-0.144457	28.6182	7834	7834	MS2	0/0	3kptc_product_trypsin-2ul_2.raw
	High	WSNIPYGDYQIFETK	Unambiguous	1	1	3kptCCatcher		CID	1	0	1	1			0.006	0.0561	1.27339	0	2.31326	19	2	930.943	1860.88	-0.352	40.1761	14270	14270	MS2	0/0	3kptc_product_trypsin-2ul_2.raw
	High	APTYTKEDGTK	Unambiguous	1	1	3kptCCatcher		CID	1	0	1	1		218267	0.004	0.02423	1.22269	1	0	77	3	404.203	1210.6	0.0372612	16.7229	1738	1738	MS2	0/0	3kptc_product_trypsin-2ul_2.raw
